# Supplementary material
Source: publisher site journal article supplement (https://www.spandidos-publications.com/3296/downloadSupplementary)
Supplement: Supplementary file 1 [file downloadSupplementary]

## Sheet: Supp1_CeRNA_summary
Table SI.Predicted ceRNA genes of seven dysregulated circRNAs.
SeqName	GeneSymbol	GeneType	CeNames	CeSymbols	CeTypes	CommonMirnas
hsa_circ_IPCEF1	hsa_circ_IPCEF1	circRNA	NM_001080404	ZNF878	protein_coding	hsa-miR-4314,hsa-miR-1323,hsa-miR-6776-5p,hsa-miR-3681-5p,hsa-miR-6895-3p,hsa-miR-433-3p,hsa-miR-4646-5p,hsa-miR-4298,hsa-miR-3692-3p,hsa-miR-4533,hsa-miR-501-5p,hsa-miR-4701-3p,hsa-miR-1262,hsa-miR-8056,hsa-miR-6736-5p,hsa-miR-204-3p,hsa-miR-3074-5p,hsa-miR-4676-3p,hsa-miR-592,hsa-miR-452-5p,hsa-miR-6077,hsa-miR-4711-3p,hsa-miR-1302,hsa-miR-892c-3p,hsa-miR-6849-5p,hsa-miR-3921,hsa-miR-4653-5p
hsa_circ_IPCEF1	hsa_circ_IPCEF1	circRNA	NM_001037814	GAB4	protein_coding	hsa-miR-4690-5p,hsa-miR-545-3p,hsa-miR-6842-5p,hsa-miR-195-5p,hsa-miR-15a-5p,hsa-miR-4685-5p,hsa-miR-6838-5p,hsa-miR-4742-5p,hsa-miR-15b-5p,hsa-miR-6732-5p,hsa-miR-370-3p,hsa-miR-3605-5p,hsa-miR-497-5p,hsa-miR-424-5p,hsa-miR-6077,hsa-miR-4499,hsa-miR-6837-5p,hsa-miR-3692-5p,hsa-miR-6857-3p,hsa-miR-6752-5p,hsa-miR-3921,hsa-miR-6893-3p,hsa-miR-7110-5p,hsa-miR-4653-5p
hsa_circ_IPCEF1	hsa_circ_IPCEF1	circRNA	NM_001004739	OR5L2	protein_coding	hsa-miR-3619-5p,hsa-miR-6894-3p,hsa-miR-6858-5p,hsa-miR-6842-5p,hsa-miR-433-3p,hsa-miR-16-5p,hsa-miR-195-5p,hsa-miR-15a-5p,hsa-miR-4533,hsa-miR-216a-3p,hsa-miR-6838-5p,hsa-miR-6876-5p,hsa-miR-128-3p,hsa-miR-4710,hsa-miR-6732-5p,hsa-miR-889-5p,hsa-miR-510-5p,hsa-miR-3605-5p,hsa-miR-497-5p,hsa-miR-761,hsa-miR-4689,hsa-miR-424-5p,hsa-miR-6077,hsa-miR-214-3p,hsa-miR-4530,hsa-miR-4476,hsa-miR-3681-3p,…
hsa_circ_IPCEF1	hsa_circ_IPCEF1	circRNA	NM_002181	IHH	protein_coding	hsa-miR-4690-5p,hsa-miR-4647,hsa-miR-608,hsa-miR-6858-5p,hsa-miR-6842-5p,hsa-miR-4662b,hsa-miR-16-5p,hsa-miR-195-5p,hsa-miR-15a-5p,hsa-miR-4685-5p,hsa-miR-6838-5p,hsa-miR-432-3p,hsa-miR-3134,hsa-miR-766-5p,hsa-miR-15b-5p,hsa-miR-7113-5p,hsa-miR-6787-3p,hsa-miR-497-5p,hsa-miR-4291,hsa-miR-4689,hsa-miR-922,hsa-miR-4426,hsa-miR-424-5p,hsa-miR-3918,hsa-miR-5706,hsa-miR-4711-3p,hsa-miR-6837-5p,hsa-miR…
hsa_circ_IPCEF1	hsa_circ_IPCEF1	circRNA	NM_001001821	OR2T34	protein_coding	hsa-miR-3619-5p,hsa-miR-4690-5p,hsa-miR-4647,hsa-miR-3691-5p,hsa-miR-3681-5p,hsa-miR-4752,hsa-miR-6858-5p,hsa-miR-545-3p,hsa-miR-6842-5p,hsa-miR-4662b,hsa-miR-16-5p,hsa-miR-195-5p,hsa-miR-15a-5p,hsa-miR-6838-5p,hsa-miR-6876-5p,hsa-miR-3166,hsa-miR-766-5p,hsa-miR-15b-5p,hsa-miR-6732-5p,hsa-miR-6787-3p,hsa-miR-510-5p,hsa-miR-3605-5p,hsa-miR-497-5p,hsa-miR-761,hsa-miR-4291,hsa-miR-4689,hsa-miR-4426,…
hsa_circRNA_074530	hsa_circ_0074530	circRNA	NM_002171	IFNA10	protein_coding	hsa-miR-515-3p,hsa-miR-1271-3p,hsa-miR-519e-3p,hsa-miR-6894-3p,hsa-miR-33b-3p
hsa_circRNA_074530	hsa_circ_0074530	circRNA	ENST00000554597	RP11-1085N6.3	protein_coding	hsa-miR-515-3p,hsa-miR-1271-3p,hsa-miR-519e-3p,hsa-miR-33b-3p,hsa-miR-6806-3p
hsa_circ_IPCEF1	hsa_circ_IPCEF1	circRNA	NM_145109	MAP2K3	protein_coding	hsa-miR-3619-5p,hsa-miR-6894-3p,hsa-miR-6776-5p,hsa-miR-608,hsa-miR-4298,hsa-miR-16-5p,hsa-miR-15a-5p,hsa-miR-4701-3p,hsa-miR-1262,hsa-miR-6838-5p,hsa-miR-432-3p,hsa-miR-4505,hsa-miR-3120-3p,hsa-miR-6736-5p,hsa-miR-6732-5p,hsa-miR-370-3p,hsa-miR-5787,hsa-miR-497-5p,hsa-miR-761,hsa-miR-214-3p,hsa-miR-1257,hsa-miR-4651,hsa-miR-3692-5p,hsa-miR-1302,hsa-miR-6752-5p,hsa-miR-3921,hsa-miR-6893-3p,hsa-mi…
hsa_circ_IPCEF1	hsa_circ_IPCEF1	circRNA	NM_006591	POLD3	protein_coding	hsa-miR-4647,hsa-miR-1323,hsa-miR-6858-5p,hsa-miR-545-3p,hsa-miR-4662b,hsa-miR-141-5p,hsa-miR-16-5p,hsa-miR-195-5p,hsa-miR-15a-5p,hsa-miR-4685-5p,hsa-miR-6838-5p,hsa-miR-6876-5p,hsa-miR-552-3p,hsa-miR-3166,hsa-miR-125a-3p,hsa-miR-766-5p,hsa-miR-128-3p,hsa-miR-15b-5p,hsa-miR-9500,hsa-miR-4710,hsa-miR-6787-3p,hsa-miR-497-5p,hsa-miR-4676-3p,hsa-miR-5586-5p,hsa-miR-4689,hsa-miR-922,hsa-miR-4426,hsa-m…
hsa_circ_IPCEF1	hsa_circ_IPCEF1	circRNA	NM_052854	CREB3L1	protein_coding	hsa-miR-3619-5p,hsa-miR-608,hsa-miR-6842-5p,hsa-miR-4646-5p,hsa-miR-16-5p,hsa-miR-195-5p,hsa-miR-15a-5p,hsa-miR-4533,hsa-miR-6838-5p,hsa-miR-6876-5p,hsa-miR-4505,hsa-miR-15b-5p,hsa-miR-9500,hsa-miR-4710,hsa-miR-5787,hsa-miR-204-3p,hsa-miR-497-5p,hsa-miR-424-5p,hsa-miR-6077,hsa-miR-214-3p,hsa-miR-4476,hsa-miR-6809-5p,hsa-miR-4651,hsa-miR-6752-5p,hsa-miR-7110-5p
hsa_circ_0095448	hsa_circ_0095448	circRNA	NM_022158	FN3K	protein_coding	hsa-miR-6887-5p,hsa-miR-6798-5p,hsa-miR-4657,hsa-miR-4725-3p,hsa-miR-4491,hsa-miR-6795-5p,hsa-miR-6780b-5p
hsa_circ_IPCEF1	hsa_circ_IPCEF1	circRNA	NM_005119	THRAP3	protein_coding	hsa-miR-3619-5p,hsa-miR-1323,hsa-miR-608,hsa-miR-6842-5p,hsa-miR-16-5p,hsa-miR-195-5p,hsa-miR-15a-5p,hsa-miR-4668-3p,hsa-miR-130b-5p,hsa-miR-6838-5p,hsa-miR-4505,hsa-miR-15b-5p,hsa-miR-6891-5p,hsa-miR-7113-5p,hsa-miR-5787,hsa-miR-497-5p,hsa-miR-761,hsa-miR-4291,hsa-miR-424-5p,hsa-miR-214-3p,hsa-miR-4779,hsa-miR-4651,hsa-miR-3692-5p,hsa-miR-6752-5p,hsa-miR-4753-3p,hsa-miR-7110-5p
hsa_circ_0020396	hsa_circ_0020396	circRNA	NM_016316	REV1	protein_coding	hsa-miR-96-3p,hsa-miR-582-5p,hsa-miR-545-5p,hsa-miR-30e-5p,hsa-miR-516a-3p,hsa-miR-516b-3p,hsa-miR-30c-5p,hsa-miR-622,hsa-miR-30a-5p,hsa-miR-21-3p,hsa-miR-30b-5p,hsa-miR-30d-5p
hsa_circ_IPCEF1	hsa_circ_IPCEF1	circRNA	NM_001042492	NF1	protein_coding	hsa-miR-4314,hsa-miR-6894-3p,hsa-miR-4752,hsa-miR-608,hsa-miR-6842-5p,hsa-miR-4646-5p,hsa-miR-16-5p,hsa-miR-15a-5p,hsa-miR-4533,hsa-miR-4685-5p,hsa-miR-216a-3p,hsa-miR-6838-5p,hsa-miR-552-3p,hsa-miR-3173-3p,hsa-miR-125a-3p,hsa-miR-766-5p,hsa-miR-128-3p,hsa-miR-15b-5p,hsa-miR-9500,hsa-miR-1468-3p,hsa-miR-4710,hsa-miR-370-3p,hsa-miR-6891-5p,hsa-miR-204-3p,hsa-miR-497-5p,hsa-miR-3074-5p,hsa-miR-4512…
hsa_circ_IPCEF1	hsa_circ_IPCEF1	circRNA	NM_024111	CHAC1	protein_coding	hsa-miR-3619-5p,hsa-miR-6776-5p,hsa-miR-4646-5p,hsa-miR-4298,hsa-miR-15a-5p,hsa-miR-6891-3p,hsa-miR-4685-5p,hsa-miR-432-3p,hsa-miR-3166,hsa-miR-4505,hsa-miR-370-3p,hsa-miR-889-5p,hsa-miR-5787,hsa-miR-204-3p,hsa-miR-497-5p,hsa-miR-761,hsa-miR-5586-5p,hsa-miR-4512,hsa-miR-3918,hsa-miR-6072,hsa-miR-214-3p,hsa-miR-6837-5p,hsa-miR-1302,hsa-miR-6893-3p
hsa_circ_IPCEF1	hsa_circ_IPCEF1	circRNA	NM_002346	LY6E	protein_coding	hsa-miR-3619-5p,hsa-miR-608,hsa-miR-6858-5p,hsa-miR-6842-5p,hsa-miR-16-5p,hsa-miR-4685-5p,hsa-miR-6838-5p,hsa-miR-6876-5p,hsa-miR-4505,hsa-miR-7113-5p,hsa-miR-5787,hsa-miR-761,hsa-miR-4689,hsa-miR-3918,hsa-miR-6837-5p,hsa-miR-4476,hsa-miR-4651,hsa-miR-6857-3p,hsa-miR-6752-5p,hsa-miR-7110-5p
hsa_circ_IPCEF1	hsa_circ_IPCEF1	circRNA	NM_032340	UQCC2	protein_coding	hsa-miR-4314,hsa-miR-6858-5p,hsa-miR-4646-5p,hsa-miR-16-5p,hsa-miR-195-5p,hsa-miR-15a-5p,hsa-miR-6891-3p,hsa-miR-4685-5p,hsa-miR-6838-5p,hsa-miR-15b-5p,hsa-miR-204-3p,hsa-miR-497-5p,hsa-miR-761,hsa-miR-4512,hsa-miR-4689,hsa-miR-922,hsa-miR-424-5p,hsa-miR-3918,hsa-miR-6072,hsa-miR-214-3p,hsa-miR-4436b-5p,hsa-miR-3681-3p,hsa-miR-3921,hsa-miR-4653-5p
hsa_circ_IPCEF1	hsa_circ_IPCEF1	circRNA	NM_001001660	LYRM5	protein_coding	hsa-miR-3619-5p,hsa-miR-4690-5p,hsa-miR-141-5p,hsa-miR-16-5p,hsa-miR-195-5p,hsa-miR-15a-5p,hsa-miR-4701-3p,hsa-miR-145-3p,hsa-miR-1262,hsa-miR-6838-5p,hsa-miR-552-3p,hsa-miR-6736-5p,hsa-miR-125a-3p,hsa-miR-15b-5p,hsa-miR-497-5p,hsa-miR-761,hsa-miR-452-5p,hsa-miR-424-5p,hsa-miR-214-3p,hsa-miR-4530,hsa-miR-892c-3p
hsa_circ_IPCEF1	hsa_circ_IPCEF1	circRNA	NM_080865	GPR62	protein_coding	hsa-miR-3619-5p,hsa-miR-6895-3p,hsa-miR-545-3p,hsa-miR-6842-5p,hsa-miR-3692-3p,hsa-miR-216a-3p,hsa-miR-6876-5p,hsa-miR-3166,hsa-miR-128-3p,hsa-miR-370-3p,hsa-miR-761,hsa-miR-3074-5p,hsa-miR-5586-5p,hsa-miR-1266-3p,hsa-miR-214-3p,hsa-miR-4530,hsa-miR-4476,hsa-miR-3681-3p,hsa-miR-6752-5p,hsa-miR-6893-3p,hsa-miR-7110-5p
hsa_circ_IPCEF1	hsa_circ_IPCEF1	circRNA	NM_000733	CD3E	protein_coding	hsa-miR-608,hsa-miR-6858-5p,hsa-miR-6842-5p,hsa-miR-16-5p,hsa-miR-195-5p,hsa-miR-15a-5p,hsa-miR-6838-5p,hsa-miR-3173-3p,hsa-miR-15b-5p,hsa-miR-9500,hsa-miR-6732-5p,hsa-miR-6891-5p,hsa-miR-6787-3p,hsa-miR-497-5p,hsa-miR-4512,hsa-miR-4689,hsa-miR-922,hsa-miR-424-5p,hsa-miR-6077,hsa-miR-3918,hsa-miR-4779,hsa-miR-4530,hsa-miR-4651,hsa-miR-6752-5p,hsa-miR-6873-3p,hsa-miR-7110-5p
hsa_circ_IPCEF1	hsa_circ_IPCEF1	circRNA	NM_178148	SLC35B2	protein_coding	hsa-miR-4647,hsa-miR-4646-5p,hsa-miR-4662b,hsa-miR-195-5p,hsa-miR-4701-3p,hsa-miR-1262,hsa-miR-6838-5p,hsa-miR-15b-5p,hsa-miR-9500,hsa-miR-370-3p,hsa-miR-204-3p,hsa-miR-497-5p,hsa-miR-922,hsa-miR-4426,hsa-miR-424-5p,hsa-miR-6077,hsa-miR-548av-3p,hsa-miR-6893-3p
hsa_circRNA_074530	hsa_circ_0074530	circRNA	NM_006579	EBP	protein_coding	hsa-miR-515-3p,hsa-miR-1271-3p,hsa-miR-519e-3p,hsa-miR-6894-3p,hsa-miR-33b-3p,hsa-miR-3127-3p
hsa_circ_IPCEF1	hsa_circ_IPCEF1	circRNA	NM_178548	TFAP2E	protein_coding	hsa-miR-4314,hsa-miR-16-5p,hsa-miR-15a-5p,hsa-miR-130b-5p,hsa-miR-6838-5p,hsa-miR-6876-5p,hsa-miR-3120-3p,hsa-miR-15b-5p,hsa-miR-497-5p,hsa-miR-4512,hsa-miR-424-5p,hsa-miR-3918,hsa-miR-5706,hsa-miR-4476,hsa-miR-4753-3p,hsa-miR-4782-5p,hsa-miR-6873-3p,hsa-miR-6841-5p
hsa_circ_IPCEF1	hsa_circ_IPCEF1	circRNA	NM_030978	ARPC5L	protein_coding	hsa-miR-3619-5p,hsa-miR-4314,hsa-miR-4690-5p,hsa-miR-4647,hsa-miR-608,hsa-miR-545-3p,hsa-miR-4646-5p,hsa-miR-4662b,hsa-miR-3692-3p,hsa-miR-552-3p,hsa-miR-8056,hsa-miR-204-3p,hsa-miR-761,hsa-miR-4291,hsa-miR-4512,hsa-miR-922,hsa-miR-4426,hsa-miR-7114-5p,hsa-miR-214-3p,hsa-miR-4436b-5p,hsa-miR-4651,hsa-miR-4653-5p
hsa_circ_IPCEF1	hsa_circ_IPCEF1	circRNA	NM_178168	OR10A5	protein_coding	hsa-miR-6858-5p,hsa-miR-433-3p,hsa-miR-16-5p,hsa-miR-195-5p,hsa-miR-15a-5p,hsa-miR-4533,hsa-miR-6838-5p,hsa-miR-6876-5p,hsa-miR-3173-3p,hsa-miR-766-5p,hsa-miR-15b-5p,hsa-miR-9500,hsa-miR-4710,hsa-miR-370-3p,hsa-miR-6891-5p,hsa-miR-3605-5p,hsa-miR-497-5p,hsa-miR-4689,hsa-miR-424-5p,hsa-miR-6077,hsa-miR-4476,hsa-miR-6893-3p
hsa_circ_IPCEF1	hsa_circ_IPCEF1	circRNA	NM_001165412	NFKB1	protein_coding	hsa-miR-16-5p,hsa-miR-195-5p,hsa-miR-15a-5p,hsa-miR-6891-3p,hsa-miR-6838-5p,hsa-miR-3120-3p,hsa-miR-548e-5p,hsa-miR-15b-5p,hsa-miR-640,hsa-miR-1468-3p,hsa-miR-497-5p,hsa-miR-5586-5p,hsa-miR-424-5p,hsa-miR-6072,hsa-miR-4530,hsa-miR-3921,hsa-miR-4753-3p,hsa-miR-4653-5p
hsa_circ_IPCEF1	hsa_circ_IPCEF1	circRNA	NM_007373	SHOC2	protein_coding	hsa-miR-1323,hsa-miR-3691-5p,hsa-miR-3681-5p,hsa-miR-4752,hsa-miR-545-3p,hsa-miR-16-5p,hsa-miR-195-5p,hsa-miR-15a-5p,hsa-miR-6838-5p,hsa-miR-4742-3p,hsa-miR-548e-5p,hsa-miR-128-3p,hsa-miR-15b-5p,hsa-miR-1468-3p,hsa-miR-497-5p,hsa-miR-4676-3p,hsa-miR-4291,hsa-miR-4512,hsa-miR-922,hsa-miR-452-5p,hsa-miR-424-5p,hsa-miR-3918,hsa-miR-892c-3p,hsa-miR-6849-5p,hsa-miR-3921,hsa-miR-6747-3p,hsa-miR-4653-5p
hsa_circ_IPCEF1	hsa_circ_IPCEF1	circRNA	NM_020808	SIPA1L2	protein_coding	hsa-miR-545-3p,hsa-miR-16-5p,hsa-miR-195-5p,hsa-miR-15a-5p,hsa-miR-6891-3p,hsa-miR-6838-5p,hsa-miR-3120-3p,hsa-miR-548e-5p,hsa-miR-15b-5p,hsa-miR-9500,hsa-miR-370-3p,hsa-miR-497-5p,hsa-miR-3074-5p,hsa-miR-4676-3p,hsa-miR-922,hsa-miR-452-5p,hsa-miR-424-5p,hsa-miR-7114-5p,hsa-miR-6072,hsa-miR-4530,hsa-miR-1257,hsa-miR-892c-3p
hsa_circRNA_074530	hsa_circ_0074530	circRNA	NM_002173	IFNA16	protein_coding	hsa-miR-515-3p,hsa-miR-1271-3p,hsa-miR-519e-3p,hsa-miR-6894-3p,hsa-miR-33b-3p
hsa_circ_IPCEF1	hsa_circ_IPCEF1	circRNA	NM_024619	FN3KRP	protein_coding	hsa-miR-4647,hsa-miR-6818-3p,hsa-miR-4662b,hsa-miR-16-5p,hsa-miR-195-5p,hsa-miR-15a-5p,hsa-miR-4533,hsa-miR-6838-5p,hsa-miR-6876-5p,hsa-miR-15b-5p,hsa-miR-7113-5p,hsa-miR-497-5p,hsa-miR-3074-5p,hsa-miR-424-5p,hsa-miR-1252-5p,hsa-miR-7114-5p,hsa-miR-4530,hsa-miR-4476,hsa-miR-4753-3p,hsa-miR-6747-3p
hsa_circ_IPCEF1	hsa_circ_IPCEF1	circRNA	NM_001278923	ANXA8L1	protein_coding	hsa-miR-4647,hsa-miR-6858-5p,hsa-miR-545-3p,hsa-miR-4646-5p,hsa-miR-4533,hsa-miR-4685-5p,hsa-miR-216a-3p,hsa-miR-6876-5p,hsa-miR-4505,hsa-miR-3120-3p,hsa-miR-766-5p,hsa-miR-128-3p,hsa-miR-640,hsa-miR-9500,hsa-miR-6787-3p,hsa-miR-5787,hsa-miR-204-3p,hsa-miR-4689,hsa-miR-4426,hsa-miR-1252-5p,hsa-miR-6077,hsa-miR-6837-5p,hsa-miR-4476,hsa-miR-3681-3p
hsa_circ_IPCEF1	hsa_circ_IPCEF1	circRNA	NM_018031	WDR6	protein_coding	hsa-miR-3619-5p,hsa-miR-5589-5p,hsa-miR-4690-5p,hsa-miR-6818-3p,hsa-miR-608,hsa-miR-6842-5p,hsa-miR-4646-5p,hsa-miR-3120-3p,hsa-miR-548e-5p,hsa-miR-204-3p,hsa-miR-3605-5p,hsa-miR-452-5p,hsa-miR-214-3p,hsa-miR-4530,hsa-miR-4651,hsa-miR-6752-5p,hsa-miR-4753-3p,hsa-miR-7110-5p
hsa_circRNA_074530	hsa_circ_0074530	circRNA	NM_012263	TTLL1	protein_coding	hsa-miR-515-3p,hsa-miR-519e-3p,hsa-miR-33b-3p
hsa_circRNA_074530	hsa_circ_0074530	circRNA	NM_001545	ICT1	protein_coding	hsa-miR-515-3p,hsa-miR-1271-3p,hsa-miR-519e-3p,hsa-miR-6894-3p,hsa-miR-33b-3p
hsa_circ_IPCEF1	hsa_circ_IPCEF1	circRNA	NM_001195518	MICU1	protein_coding	hsa-miR-3619-5p,hsa-miR-4690-5p,hsa-miR-6894-3p,hsa-miR-3691-5p,hsa-miR-141-5p,hsa-miR-16-5p,hsa-miR-195-5p,hsa-miR-15a-5p,hsa-miR-6891-3p,hsa-miR-6838-5p,hsa-miR-432-3p,hsa-miR-766-5p,hsa-miR-15b-5p,hsa-miR-9500,hsa-miR-6732-5p,hsa-miR-7113-5p,hsa-miR-6787-3p,hsa-miR-497-5p,hsa-miR-761,hsa-miR-922,hsa-miR-424-5p,hsa-miR-6072,hsa-miR-214-3p,hsa-miR-4779,hsa-miR-4530,hsa-miR-3921,hsa-miR-4653-5p
hsa_circ_IPCEF1	hsa_circ_IPCEF1	circRNA	ENST00000429220	ZNF259	protein_coding	hsa-miR-6837-3p,hsa-miR-4646-5p,hsa-miR-141-5p,hsa-miR-16-5p,hsa-miR-195-5p,hsa-miR-15a-5p,hsa-miR-4533,hsa-miR-4685-5p,hsa-miR-6838-5p,hsa-miR-15b-5p,hsa-miR-4710,hsa-miR-6891-5p,hsa-miR-6787-3p,hsa-miR-5787,hsa-miR-204-3p,hsa-miR-497-5p,hsa-miR-922,hsa-miR-1266-3p,hsa-miR-452-5p,hsa-miR-424-5p,hsa-miR-1252-5p,hsa-miR-3918,hsa-miR-5706,hsa-miR-6837-5p,hsa-miR-6809-5p,hsa-miR-7152-5p,hsa-miR-3692…
hsa_circ_IPCEF1	hsa_circ_IPCEF1	circRNA	NM_014550	CARD10	protein_coding	hsa-miR-608,hsa-miR-6858-5p,hsa-miR-6842-5p,hsa-miR-16-5p,hsa-miR-195-5p,hsa-miR-15a-5p,hsa-miR-4685-5p,hsa-miR-6838-5p,hsa-miR-6876-5p,hsa-miR-552-3p,hsa-miR-3173-3p,hsa-miR-125a-3p,hsa-miR-7113-5p,hsa-miR-889-5p,hsa-miR-497-5p,hsa-miR-4689,hsa-miR-424-5p,hsa-miR-3918,hsa-miR-6837-5p,hsa-miR-4476,hsa-miR-4651,hsa-miR-6752-5p,hsa-miR-7110-5p
hsa_circ_0057691	hsa_circ_0057691	circRNA	ENST00000423336	COX6A1P2	protein_coding	hsa-miR-30c-1-3p,hsa-miR-30c-2-3p
hsa_circ_IPCEF1	hsa_circ_IPCEF1	circRNA	NM_014555	TRPM5	protein_coding	hsa-miR-608,hsa-miR-6858-5p,hsa-miR-6842-5p,hsa-miR-3692-3p,hsa-miR-4701-3p,hsa-miR-1262,hsa-miR-216a-3p,hsa-miR-432-3p,hsa-miR-6736-5p,hsa-miR-128-3p,hsa-miR-4710,hsa-miR-4689,hsa-miR-3918,hsa-miR-4779,hsa-miR-3681-3p,hsa-miR-4651,hsa-miR-3692-5p,hsa-miR-6752-5p,hsa-miR-7110-5p
hsa_circ_IPCEF1	hsa_circ_IPCEF1	circRNA	NM_001004450	OR1B1	protein_coding	hsa-miR-3619-5p,hsa-miR-4690-5p,hsa-miR-4752,hsa-miR-16-5p,hsa-miR-195-5p,hsa-miR-15a-5p,hsa-miR-4701-3p,hsa-miR-1262,hsa-miR-6838-5p,hsa-miR-6876-5p,hsa-miR-552-3p,hsa-miR-3120-3p,hsa-miR-6736-5p,hsa-miR-15b-5p,hsa-miR-4710,hsa-miR-6732-5p,hsa-miR-497-5p,hsa-miR-761,hsa-miR-424-5p,hsa-miR-7114-5p,hsa-miR-214-3p,hsa-miR-4530,hsa-miR-4476
hsa_circ_IPCEF1	hsa_circ_IPCEF1	circRNA	NM_058222	TECTB	protein_coding	hsa-miR-1323,hsa-miR-608,hsa-miR-545-3p,hsa-miR-16-5p,hsa-miR-195-5p,hsa-miR-15a-5p,hsa-miR-6838-5p,hsa-miR-3120-3p,hsa-miR-15b-5p,hsa-miR-6787-3p,hsa-miR-497-5p,hsa-miR-4291,hsa-miR-5586-5p,hsa-miR-592,hsa-miR-424-5p,hsa-miR-4762-3p,hsa-miR-5706,hsa-miR-548av-3p,hsa-miR-4530,hsa-miR-1257,hsa-miR-4651,hsa-miR-3921,hsa-miR-4782-5p,hsa-miR-4653-5p
hsa_circRNA_074530	hsa_circ_0074530	circRNA	NM_024540	MRPL24	protein_coding	hsa-miR-515-3p,hsa-miR-519e-3p,hsa-miR-33b-3p
hsa_circ_IPCEF1	hsa_circ_IPCEF1	circRNA	NM_007364	TMED3	protein_coding	hsa-miR-4690-5p,hsa-miR-16-5p,hsa-miR-15a-5p,hsa-miR-4685-5p,hsa-miR-216a-3p,hsa-miR-6838-5p,hsa-miR-128-3p,hsa-miR-15b-5p,hsa-miR-889-5p,hsa-miR-497-5p,hsa-miR-761,hsa-miR-3074-5p,hsa-miR-4512,hsa-miR-424-5p,hsa-miR-4762-3p,hsa-miR-3918,hsa-miR-214-3p,hsa-miR-6837-5p,hsa-miR-4530,hsa-miR-3681-3p,hsa-miR-3921
hsa_circRNA_100721	hsa_circ_0020396	circRNA	NM_152391	PQLC3	protein_coding	hsa-miR-103a-2-5p,hsa-miR-136-5p,hsa-miR-502-5p,hsa-miR-301a-3p,hsa-miR-128-3p,hsa-miR-216a-3p,hsa-miR-454-3p,hsa-miR-103a-3p,hsa-miR-107,hsa-miR-30e-5p,hsa-miR-617,hsa-miR-328-3p,hsa-miR-30c-5p,hsa-miR-22-5p,hsa-miR-130a-3p,hsa-miR-30a-5p,hsa-miR-21-3p,hsa-miR-30b-5p,hsa-miR-30d-5p,hsa-miR-432-3p,hsa-miR-10b-5p,hsa-miR-10a-5p
hsa_circ_IPCEF1	hsa_circ_IPCEF1	circRNA	NM_001005235	OR1L4	protein_coding	hsa-miR-3619-5p,hsa-miR-5589-5p,hsa-miR-4647,hsa-miR-6776-5p,hsa-miR-6818-3p,hsa-miR-4662b,hsa-miR-216a-3p,hsa-miR-6876-5p,hsa-miR-4505,hsa-miR-128-3p,hsa-miR-6732-5p,hsa-miR-5787,hsa-miR-3605-5p,hsa-miR-761,hsa-miR-592,hsa-miR-4426,hsa-miR-6077,hsa-miR-214-3p,hsa-miR-5706,hsa-miR-4436b-5p,hsa-miR-4530,hsa-miR-4476,hsa-miR-892a,hsa-miR-4782-5p
hsa_circ_IPCEF1	hsa_circ_IPCEF1	circRNA	NM_030901	OR7A17	protein_coding	hsa-miR-3691-5p,hsa-miR-6776-5p,hsa-miR-608,hsa-miR-6842-5p,hsa-miR-433-3p,hsa-miR-4701-3p,hsa-miR-1262,hsa-miR-216a-3p,hsa-miR-6876-5p,hsa-miR-552-3p,hsa-miR-4742-5p,hsa-miR-548e-5p,hsa-miR-6736-5p,hsa-miR-766-5p,hsa-miR-128-3p,hsa-miR-370-3p,hsa-miR-3605-5p,hsa-miR-922,hsa-miR-4312,hsa-miR-1298-3p,hsa-miR-4476,hsa-miR-6809-5p,hsa-miR-3681-3p,hsa-miR-4504,hsa-miR-4651,hsa-miR-6752-5p,hsa-miR-478…
hsa_circ_0095448	hsa_circ_0095448	circRNA	NM_174928	N6AMT2	protein_coding	hsa-miR-6887-5p,hsa-miR-4725-3p,hsa-miR-3125,hsa-miR-6795-5p,hsa-miR-4271,hsa-miR-6859-5p,hsa-miR-6077,hsa-miR-3916,hsa-miR-6780b-5p
hsa_circ_IPCEF1	hsa_circ_IPCEF1	circRNA	NM_015457	ZDHHC5	protein_coding	hsa-miR-4298,hsa-miR-4533,hsa-miR-6891-3p,hsa-miR-4685-5p,hsa-miR-6876-5p,hsa-miR-4505,hsa-miR-3173-3p,hsa-miR-9500,hsa-miR-370-3p,hsa-miR-6891-5p,hsa-miR-7113-5p,hsa-miR-5787,hsa-miR-3074-5p,hsa-miR-4512,hsa-miR-6077,hsa-miR-3918,hsa-miR-6072,hsa-miR-4779,hsa-miR-4711-3p,hsa-miR-6837-5p,hsa-miR-4530,hsa-miR-4476,hsa-miR-7152-5p,hsa-miR-3692-5p,hsa-miR-1302,hsa-miR-6873-3p,hsa-miR-6893-3p
hsa_circ_IPCEF1	hsa_circ_IPCEF1	circRNA	NM_021873	CDC25B	protein_coding	hsa-miR-3619-5p,hsa-miR-4690-5p,hsa-miR-608,hsa-miR-4298,hsa-miR-16-5p,hsa-miR-195-5p,hsa-miR-15a-5p,hsa-miR-4533,hsa-miR-6838-5p,hsa-miR-6876-5p,hsa-miR-3166,hsa-miR-4505,hsa-miR-15b-5p,hsa-miR-370-3p,hsa-miR-5787,hsa-miR-497-5p,hsa-miR-761,hsa-miR-3074-5p,hsa-miR-4291,hsa-miR-4512,hsa-miR-424-5p,hsa-miR-1298-3p,hsa-miR-3918,hsa-miR-214-3p,hsa-miR-4530,hsa-miR-4476,hsa-miR-4651,hsa-miR-6893-3p
hsa_circ_IPCEF1	hsa_circ_IPCEF1	circRNA	NM_004259	RECQL5	protein_coding	hsa-miR-3619-5p,hsa-miR-6842-5p,hsa-miR-6838-5p,hsa-miR-125a-3p,hsa-miR-4710,hsa-miR-6732-5p,hsa-miR-761,hsa-miR-4291,hsa-miR-4512,hsa-miR-1298-3p,hsa-miR-6072,hsa-miR-214-3p,hsa-miR-4530,hsa-miR-6809-5p,hsa-miR-6752-5p,hsa-miR-3921,hsa-miR-7110-5p,hsa-miR-4653-5p
hsa_circ_IPCEF1	hsa_circ_IPCEF1	circRNA	NM_201521	KLC4	protein_coding	hsa-miR-3619-5p,hsa-miR-4690-5p,hsa-miR-608,hsa-miR-6858-5p,hsa-miR-6842-5p,hsa-miR-16-5p,hsa-miR-195-5p,hsa-miR-15a-5p,hsa-miR-145-3p,hsa-miR-4685-5p,hsa-miR-6838-5p,hsa-miR-15b-5p,hsa-miR-497-5p,hsa-miR-761,hsa-miR-4689,hsa-miR-922,hsa-miR-424-5p,hsa-miR-214-3p,hsa-miR-4779,hsa-miR-6837-5p,hsa-miR-4530,hsa-miR-4651,hsa-miR-6752-5p,hsa-miR-3921,hsa-miR-7110-5p,hsa-miR-4653-5p
hsa_circ_IPCEF1	hsa_circ_IPCEF1	circRNA	NM_001004734	OR14I1	protein_coding	hsa-miR-3619-5p,hsa-miR-608,hsa-miR-6858-5p,hsa-miR-545-3p,hsa-miR-6842-5p,hsa-miR-4685-5p,hsa-miR-216a-3p,hsa-miR-6876-5p,hsa-miR-3134,hsa-miR-128-3p,hsa-miR-6732-5p,hsa-miR-889-5p,hsa-miR-4291,hsa-miR-922,hsa-miR-3918,hsa-miR-214-3p,hsa-miR-6837-5p,hsa-miR-4476,hsa-miR-892a,hsa-miR-3681-3p,hsa-miR-4651,hsa-miR-6857-3p,hsa-miR-6752-5p,hsa-miR-4645-3p,hsa-miR-7110-5p
hsa_circ_0095448	hsa_circ_0095448	circRNA	NM_005805	PSMD14	protein_coding	hsa-miR-504-5p,hsa-miR-769-3p,hsa-miR-3125,hsa-miR-450b-3p,hsa-miR-2113,hsa-miR-6859-5p,hsa-miR-3916
hsa_circ_0095448	hsa_circ_0095448	circRNA	NM_001281429	PCED1B	protein_coding	hsa-miR-5589-5p,hsa-miR-4725-3p,hsa-miR-650,hsa-miR-3612,hsa-miR-4271,hsa-miR-6077,hsa-miR-6780b-5p
hsa_circ_IPCEF1	hsa_circ_IPCEF1	circRNA	NM_001006938	TCEAL6	protein_coding	hsa-miR-6894-3p,hsa-miR-16-5p,hsa-miR-195-5p,hsa-miR-15a-5p,hsa-miR-4668-3p,hsa-miR-1262,hsa-miR-6838-5p,hsa-miR-552-3p,hsa-miR-6736-5p,hsa-miR-125a-3p,hsa-miR-15b-5p,hsa-miR-9500,hsa-miR-7113-5p,hsa-miR-497-5p,hsa-miR-922,hsa-miR-424-5p,hsa-miR-4762-3p,hsa-miR-4711-3p,hsa-miR-3692-5p
hsa_circ_IPCEF1	hsa_circ_IPCEF1	circRNA	ENST00000332558	AC009365.3	protein_coding	hsa-miR-6894-3p,hsa-miR-6776-5p,hsa-miR-6818-3p,hsa-miR-545-3p,hsa-miR-4646-5p,hsa-miR-16-5p,hsa-miR-195-5p,hsa-miR-15a-5p,hsa-miR-4668-3p,hsa-miR-1262,hsa-miR-4685-5p,hsa-miR-6838-5p,hsa-miR-6876-5p,hsa-miR-3134,hsa-miR-766-5p,hsa-miR-15b-5p,hsa-miR-204-3p,hsa-miR-497-5p,hsa-miR-922,hsa-miR-592,hsa-miR-1266-3p,hsa-miR-6837-5p,hsa-miR-4476,hsa-miR-6809-5p,hsa-miR-4504,hsa-miR-3692-5p,hsa-miR-6747…
hsa_circ_IPCEF1	hsa_circ_IPCEF1	circRNA	NM_000388	CASR	protein_coding	hsa-miR-3619-5p,hsa-miR-4690-5p,hsa-miR-4647,hsa-miR-6776-5p,hsa-miR-6818-3p,hsa-miR-6895-3p,hsa-miR-608,hsa-miR-545-3p,hsa-miR-4662b,hsa-miR-16-5p,hsa-miR-195-5p,hsa-miR-15a-5p,hsa-miR-4701-3p,hsa-miR-1262,hsa-miR-6838-5p,hsa-miR-3166,hsa-miR-3120-3p,hsa-miR-6736-5p,hsa-miR-15b-5p,hsa-miR-6787-3p,hsa-miR-497-5p,hsa-miR-761,hsa-miR-4426,hsa-miR-424-5p,hsa-miR-6077,hsa-miR-214-3p,hsa-miR-5706,hsa-…
hsa_circ_IPCEF1	hsa_circ_IPCEF1	circRNA	NM_001001683	MED11	protein_coding	hsa-miR-3619-5p,hsa-miR-6818-3p,hsa-miR-16-5p,hsa-miR-195-5p,hsa-miR-15a-5p,hsa-miR-6838-5p,hsa-miR-552-3p,hsa-miR-4505,hsa-miR-125a-3p,hsa-miR-15b-5p,hsa-miR-370-3p,hsa-miR-5787,hsa-miR-497-5p,hsa-miR-761,hsa-miR-424-5p,hsa-miR-4530,hsa-miR-3692-5p,hsa-miR-3921,hsa-miR-4653-5p,hsa-miR-6841-5p
hsa_circ_IPCEF1	hsa_circ_IPCEF1	circRNA	NM_152574	TTC39B	protein_coding	hsa-miR-3619-5p,hsa-miR-548g-3p,hsa-miR-6818-3p,hsa-miR-16-5p,hsa-miR-195-5p,hsa-miR-15a-5p,hsa-miR-501-5p,hsa-miR-216a-3p,hsa-miR-6838-5p,hsa-miR-4742-5p,hsa-miR-128-3p,hsa-miR-497-5p,hsa-miR-761,hsa-miR-4676-3p,hsa-miR-424-5p,hsa-miR-214-3p,hsa-miR-3681-3p,hsa-miR-892c-3p
hsa_circ_IPCEF1	hsa_circ_IPCEF1	circRNA	NM_001030311	CERKL	protein_coding	hsa-miR-3619-5p,hsa-miR-4314,hsa-miR-494-5p,hsa-miR-4646-5p,hsa-miR-16-5p,hsa-miR-195-5p,hsa-miR-15a-5p,hsa-miR-216a-3p,hsa-miR-6838-5p,hsa-miR-4742-3p,hsa-miR-128-3p,hsa-miR-15b-5p,hsa-miR-4710,hsa-miR-323b-5p,hsa-miR-410-5p,hsa-miR-204-3p,hsa-miR-497-5p,hsa-miR-761,hsa-miR-4291,hsa-miR-424-5p,hsa-miR-5706,hsa-miR-4782-5p
hsa_circRNA_100721	hsa_circ_0020396	circRNA	NM_000997	RPL37	protein_coding	hsa-miR-132-3p,hsa-miR-324-3p,hsa-miR-212-3p,hsa-miR-556-5p,hsa-miR-455-3p,hsa-miR-128-3p,hsa-miR-216a-3p,hsa-miR-497-3p,hsa-miR-181b-2-3p,hsa-miR-30e-5p,hsa-miR-204-5p,hsa-miR-181b-3p,hsa-miR-30c-5p,hsa-miR-30a-5p,hsa-miR-30b-5p,hsa-miR-30d-5p,hsa-miR-10b-5p,hsa-miR-10a-5p,hsa-miR-488-5p
hsa_circ_0057691	hsa_circ_0057691	circRNA	NM_183239	GSTO2	protein_coding	hsa-miR-150-5p,hsa-miR-218-1-3p
hsa_circ_IPCEF1	hsa_circ_IPCEF1	circRNA	NM_001005326	OR4F6	protein_coding	hsa-miR-3619-5p,hsa-miR-4647,hsa-miR-6858-5p,hsa-miR-433-3p,hsa-miR-4662b,hsa-miR-16-5p,hsa-miR-195-5p,hsa-miR-15a-5p,hsa-miR-6838-5p,hsa-miR-766-5p,hsa-miR-15b-5p,hsa-miR-497-5p,hsa-miR-761,hsa-miR-4689,hsa-miR-4426,hsa-miR-424-5p,hsa-miR-6077,hsa-miR-7114-5p,hsa-miR-214-3p,hsa-miR-4530,hsa-miR-6809-5p
hsa_circ_IPCEF1	hsa_circ_IPCEF1	circRNA	ENST00000345988	PPL	protein_coding	hsa-miR-6858-5p,hsa-miR-16-5p,hsa-miR-195-5p,hsa-miR-15a-5p,hsa-miR-4685-5p,hsa-miR-3173-3p,hsa-miR-766-5p,hsa-miR-15b-5p,hsa-miR-6891-5p,hsa-miR-510-5p,hsa-miR-3605-5p,hsa-miR-497-5p,hsa-miR-4689,hsa-miR-452-5p,hsa-miR-424-5p,hsa-miR-6837-5p,hsa-miR-6809-5p,hsa-miR-1257,hsa-miR-892c-3p,hsa-miR-3921,hsa-miR-4653-5p
hsa_circ_IPCEF1	hsa_circ_IPCEF1	circRNA	NM_175062	RASGEF1C	protein_coding	hsa-miR-6894-3p,hsa-miR-6776-5p,hsa-miR-3692-3p,hsa-miR-195-5p,hsa-miR-15a-5p,hsa-miR-4685-5p,hsa-miR-6838-5p,hsa-miR-4505,hsa-miR-15b-5p,hsa-miR-4710,hsa-miR-6732-5p,hsa-miR-370-3p,hsa-miR-5787,hsa-miR-3605-5p,hsa-miR-497-5p,hsa-miR-424-5p,hsa-miR-3918,hsa-miR-6837-5p,hsa-miR-4530,hsa-miR-4476,hsa-miR-6893-3p
hsa_circ_IPCEF1	hsa_circ_IPCEF1	circRNA	NM_006698	BLCAP	protein_coding	hsa-miR-3619-5p,hsa-miR-4314,hsa-miR-4690-5p,hsa-miR-548g-3p,hsa-miR-608,hsa-miR-6858-5p,hsa-miR-4646-5p,hsa-miR-4298,hsa-miR-16-5p,hsa-miR-195-5p,hsa-miR-15a-5p,hsa-miR-4533,hsa-miR-130b-5p,hsa-miR-6838-5p,hsa-miR-6876-5p,hsa-miR-432-3p,hsa-miR-3134,hsa-miR-3173-3p,hsa-miR-4742-5p,hsa-miR-548e-5p,hsa-miR-125a-3p,hsa-miR-15b-5p,hsa-miR-370-3p,hsa-miR-6891-5p,hsa-miR-5787,hsa-miR-204-3p,hsa-miR-36…
hsa_circ_IPCEF1	hsa_circ_IPCEF1	circRNA	NM_001284309	ADAP1	protein_coding	hsa-miR-6776-5p,hsa-miR-15a-5p,hsa-miR-4533,hsa-miR-4685-5p,hsa-miR-216a-3p,hsa-miR-6838-5p,hsa-miR-6876-5p,hsa-miR-4505,hsa-miR-766-5p,hsa-miR-128-3p,hsa-miR-15b-5p,hsa-miR-4710,hsa-miR-5787,hsa-miR-497-5p,hsa-miR-4689,hsa-miR-424-5p,hsa-miR-3918,hsa-miR-6837-5p,hsa-miR-4476,hsa-miR-6809-5p,hsa-miR-3681-3p,hsa-miR-6747-3p
hsa_circRNA_074530	hsa_circ_0074530	circRNA	NM_032907	UBL7	protein_coding	hsa-miR-515-3p,hsa-miR-519e-3p,hsa-miR-33b-3p
hsa_circ_IPCEF1	hsa_circ_IPCEF1	circRNA	NM_138420	AHNAK2	protein_coding	hsa-miR-3619-5p,hsa-miR-3691-5p,hsa-miR-4646-5p,hsa-miR-16-5p,hsa-miR-195-5p,hsa-miR-15a-5p,hsa-miR-216a-3p,hsa-miR-6838-5p,hsa-miR-128-3p,hsa-miR-15b-5p,hsa-miR-204-3p,hsa-miR-497-5p,hsa-miR-761,hsa-miR-424-5p,hsa-miR-214-3p,hsa-miR-4711-3p,hsa-miR-4530,hsa-miR-6809-5p,hsa-miR-3681-3p,hsa-miR-4504,hsa-miR-3692-5p,hsa-miR-3921,hsa-miR-4653-5p
hsa_circ_IPCEF1	hsa_circ_IPCEF1	circRNA	NM_012140	SLC25A10	protein_coding	hsa-miR-3619-5p,hsa-miR-608,hsa-miR-6842-5p,hsa-miR-1262,hsa-miR-3166,hsa-miR-3173-3p,hsa-miR-6736-5p,hsa-miR-766-5p,hsa-miR-370-3p,hsa-miR-6891-5p,hsa-miR-7113-5p,hsa-miR-3605-5p,hsa-miR-761,hsa-miR-4291,hsa-miR-4689,hsa-miR-922,hsa-miR-1266-3p,hsa-miR-214-3p,hsa-miR-4530,hsa-miR-4651,hsa-miR-3692-5p,hsa-miR-6752-5p
hsa_circ_IPCEF1	hsa_circ_IPCEF1	circRNA	NM_002595	CDK17	protein_coding	hsa-miR-4647,hsa-miR-6858-5p,hsa-miR-433-3p,hsa-miR-4662b,hsa-miR-16-5p,hsa-miR-3692-3p,hsa-miR-195-5p,hsa-miR-15a-5p,hsa-miR-216a-3p,hsa-miR-6838-5p,hsa-miR-128-3p,hsa-miR-15b-5p,hsa-miR-497-5p,hsa-miR-4689,hsa-miR-922,hsa-miR-4426,hsa-miR-6853-3p,hsa-miR-424-5p,hsa-miR-1252-5p,hsa-miR-4436b-5p,hsa-miR-4530,hsa-miR-892a,hsa-miR-1257,hsa-miR-3681-3p,hsa-miR-4504,hsa-miR-4645-3p
hsa_circ_IPCEF1	hsa_circ_IPCEF1	circRNA	NM_000386	BLMH	protein_coding	hsa-miR-6818-3p,hsa-miR-6858-5p,hsa-miR-16-5p,hsa-miR-195-5p,hsa-miR-15a-5p,hsa-miR-4533,hsa-miR-6838-5p,hsa-miR-6876-5p,hsa-miR-15b-5p,hsa-miR-497-5p,hsa-miR-3074-5p,hsa-miR-4689,hsa-miR-424-5p,hsa-miR-4530,hsa-miR-4476,hsa-miR-892a,hsa-miR-7152-5p,hsa-miR-6857-3p,hsa-miR-6873-3p
hsa_circ_0095448	hsa_circ_0095448	circRNA	NM_001199661	PMF1-BGLAP	protein_coding	hsa-miR-646,hsa-miR-4725-3p,hsa-miR-3125,hsa-miR-4271,hsa-miR-6859-5p,hsa-miR-3916,hsa-miR-6780b-5p
hsa_circ_IPCEF1	hsa_circ_IPCEF1	circRNA	NM_016490	FAM178B	protein_coding	hsa-miR-608,hsa-miR-4533,hsa-miR-6876-5p,hsa-miR-4505,hsa-miR-3173-3p,hsa-miR-9500,hsa-miR-370-3p,hsa-miR-6891-5p,hsa-miR-7113-5p,hsa-miR-889-5p,hsa-miR-5787,hsa-miR-3074-5p,hsa-miR-1266-3p,hsa-miR-6077,hsa-miR-6072,hsa-miR-4779,hsa-miR-4476,hsa-miR-4651,hsa-miR-6893-3p
hsa_circ_0000277	hsa_circ_0000277	circRNA	NM_031903	MRPL32	protein_coding	hsa-miR-138-2-3p,hsa-miR-205-3p
hsa_circ_IPCEF1	hsa_circ_IPCEF1	circRNA	ENST00000376403	FAM182B	protein_coding	hsa-miR-4314,hsa-miR-5589-5p,hsa-miR-1323,hsa-miR-6894-3p,hsa-miR-3681-5p,hsa-miR-6858-5p,hsa-miR-6842-5p,hsa-miR-4646-5p,hsa-miR-8056,hsa-miR-204-3p,hsa-miR-4689,hsa-miR-4312,hsa-miR-4779,hsa-miR-3692-5p,hsa-miR-6752-5p,hsa-miR-6849-5p,hsa-miR-6893-3p,hsa-miR-7110-5p
hsa_circ_IPCEF1	hsa_circ_IPCEF1	circRNA	NM_030764	FCRL2	protein_coding	hsa-miR-548g-3p,hsa-miR-16-5p,hsa-miR-195-5p,hsa-miR-15a-5p,hsa-miR-216a-3p,hsa-miR-6838-5p,hsa-miR-3173-3p,hsa-miR-125a-3p,hsa-miR-766-5p,hsa-miR-128-3p,hsa-miR-15b-5p,hsa-miR-370-3p,hsa-miR-6891-5p,hsa-miR-497-5p,hsa-miR-5586-5p,hsa-miR-1266-3p,hsa-miR-424-5p,hsa-miR-6077,hsa-miR-5706,hsa-miR-4530,hsa-miR-3681-3p,hsa-miR-4782-5p,hsa-miR-6747-3p,hsa-miR-6893-3p
hsa_circRNA_074530	hsa_circ_0074530	circRNA	NM_016175	C5orf45	protein_coding	hsa-miR-515-3p,hsa-miR-33b-3p,hsa-miR-2116-5p
hsa_circ_IPCEF1	hsa_circ_IPCEF1	circRNA	NM_031289	GSG1	protein_coding	hsa-miR-5589-5p,hsa-miR-4647,hsa-miR-3691-5p,hsa-miR-4752,hsa-miR-608,hsa-miR-4298,hsa-miR-4662b,hsa-miR-16-5p,hsa-miR-15a-5p,hsa-miR-28-3p,hsa-miR-4701-3p,hsa-miR-1262,hsa-miR-6838-5p,hsa-miR-432-3p,hsa-miR-4505,hsa-miR-6736-5p,hsa-miR-15b-5p,hsa-miR-889-5p,hsa-miR-5787,hsa-miR-497-5p,hsa-miR-4291,hsa-miR-4689,hsa-miR-922,hsa-miR-4426,hsa-miR-424-5p,hsa-miR-1252-5p,hsa-miR-4711-3p,hsa-miR-4651,h…
hsa_circ_IPCEF1	hsa_circ_IPCEF1	circRNA	NM_031200	CCR9	protein_coding	hsa-miR-3619-5p,hsa-miR-4647,hsa-miR-548g-3p,hsa-miR-433-3p,hsa-miR-4662b,hsa-miR-16-5p,hsa-miR-195-5p,hsa-miR-15a-5p,hsa-miR-130b-5p,hsa-miR-216a-3p,hsa-miR-6838-5p,hsa-miR-3166,hsa-miR-4742-3p,hsa-miR-548e-5p,hsa-miR-128-3p,hsa-miR-15b-5p,hsa-miR-497-5p,hsa-miR-761,hsa-miR-4676-3p,hsa-miR-4426,hsa-miR-4312,hsa-miR-424-5p,hsa-miR-1252-5p,hsa-miR-6077,hsa-miR-3918,hsa-miR-214-3p,hsa-miR-4530,hsa-…
hsa_circ_IPCEF1	hsa_circ_IPCEF1	circRNA	NM_006939	SOS2	protein_coding	hsa-miR-4647,hsa-miR-1323,hsa-miR-548g-3p,hsa-miR-545-3p,hsa-miR-4662b,hsa-miR-16-5p,hsa-miR-195-5p,hsa-miR-15a-5p,hsa-miR-6838-5p,hsa-miR-548e-5p,hsa-miR-15b-5p,hsa-miR-3605-5p,hsa-miR-497-5p,hsa-miR-4676-3p,hsa-miR-4291,hsa-miR-5089-3p,hsa-miR-4426,hsa-miR-452-5p,hsa-miR-424-5p,hsa-miR-6809-5p,hsa-miR-892c-3p
hsa_circ_IPCEF1	hsa_circ_IPCEF1	circRNA	NM_004408	DNM1	protein_coding	hsa-miR-3619-5p,hsa-miR-6894-3p,hsa-miR-608,hsa-miR-6842-5p,hsa-miR-216a-3p,hsa-miR-4505,hsa-miR-3173-3p,hsa-miR-128-3p,hsa-miR-6732-5p,hsa-miR-6891-5p,hsa-miR-5787,hsa-miR-761,hsa-miR-214-3p,hsa-miR-6809-5p,hsa-miR-3681-3p,hsa-miR-4651,hsa-miR-6752-5p,hsa-miR-7110-5p
hsa_circ_IPCEF1	hsa_circ_IPCEF1	circRNA	NM_002570	PCSK6	protein_coding	hsa-miR-4752,hsa-miR-16-5p,hsa-miR-195-5p,hsa-miR-15a-5p,hsa-miR-130b-5p,hsa-miR-6838-5p,hsa-miR-6876-5p,hsa-miR-432-3p,hsa-miR-552-3p,hsa-miR-8056,hsa-miR-3134,hsa-miR-548e-5p,hsa-miR-766-5p,hsa-miR-15b-5p,hsa-miR-889-5p,hsa-miR-3605-5p,hsa-miR-592,hsa-miR-424-5p,hsa-miR-7114-5p,hsa-miR-4476,hsa-miR-892a,hsa-miR-4504,hsa-miR-4753-3p
hsa_circ_IPCEF1	hsa_circ_IPCEF1	circRNA	NM_002712	PPP1R7	protein_coding	hsa-miR-5589-5p,hsa-miR-4298,hsa-miR-16-5p,hsa-miR-195-5p,hsa-miR-15a-5p,hsa-miR-6838-5p,hsa-miR-552-3p,hsa-miR-4505,hsa-miR-4742-5p,hsa-miR-15b-5p,hsa-miR-510-5p,hsa-miR-5787,hsa-miR-497-5p,hsa-miR-424-5p,hsa-miR-1252-5p,hsa-miR-4711-3p,hsa-miR-6809-5p,hsa-miR-6873-3p
hsa_circ_IPCEF1	hsa_circ_IPCEF1	circRNA	NM_152468	TMC8	protein_coding	hsa-miR-5589-5p,hsa-miR-4690-5p,hsa-miR-4647,hsa-miR-6776-5p,hsa-miR-608,hsa-miR-6842-5p,hsa-miR-4662b,hsa-miR-16-5p,hsa-miR-195-5p,hsa-miR-15a-5p,hsa-miR-4701-3p,hsa-miR-6891-3p,hsa-miR-145-3p,hsa-miR-1262,hsa-miR-4685-5p,hsa-miR-6838-5p,hsa-miR-6876-5p,hsa-miR-4505,hsa-miR-3173-3p,hsa-miR-6736-5p,hsa-miR-125a-3p,hsa-miR-15b-5p,hsa-miR-370-3p,hsa-miR-6891-5p,hsa-miR-7113-5p,hsa-miR-510-5p,hsa-mi…
hsa_circ_IPCEF1	hsa_circ_IPCEF1	circRNA	NM_030912	TRIM8	protein_coding	hsa-miR-4314,hsa-miR-4647,hsa-miR-6858-5p,hsa-miR-4646-5p,hsa-miR-4533,hsa-miR-4685-5p,hsa-miR-6876-5p,hsa-miR-4505,hsa-miR-4742-5p,hsa-miR-4710,hsa-miR-370-3p,hsa-miR-5787,hsa-miR-204-3p,hsa-miR-4689,hsa-miR-592,hsa-miR-6077,hsa-miR-3918,hsa-miR-5706,hsa-miR-6837-5p,hsa-miR-4476,hsa-miR-6809-5p,hsa-miR-6752-5p,hsa-miR-3921,hsa-miR-4782-5p,hsa-miR-6893-3p,hsa-miR-7110-5p,hsa-miR-4653-5p
hsa_circ_IPCEF1	hsa_circ_IPCEF1	circRNA	NM_001001827	OR2T35	protein_coding	hsa-miR-3619-5p,hsa-miR-4314,hsa-miR-4690-5p,hsa-miR-4647,hsa-miR-3691-5p,hsa-miR-4752,hsa-miR-6858-5p,hsa-miR-6842-5p,hsa-miR-4662b,hsa-miR-195-5p,hsa-miR-15a-5p,hsa-miR-4533,hsa-miR-4701-3p,hsa-miR-1262,hsa-miR-6838-5p,hsa-miR-6876-5p,hsa-miR-3166,hsa-miR-4505,hsa-miR-6736-5p,hsa-miR-766-5p,hsa-miR-15b-5p,hsa-miR-4710,hsa-miR-5787,hsa-miR-3605-5p,hsa-miR-497-5p,hsa-miR-761,hsa-miR-4689,hsa-miR-…
hsa_circ_IPCEF1	hsa_circ_IPCEF1	circRNA	NM_001004476	OR10K2	protein_coding	hsa-miR-3619-5p,hsa-miR-4314,hsa-miR-6858-5p,hsa-miR-4298,hsa-miR-4533,hsa-miR-6876-5p,hsa-miR-432-3p,hsa-miR-3173-3p,hsa-miR-125a-3p,hsa-miR-766-5p,hsa-miR-6891-5p,hsa-miR-7113-5p,hsa-miR-3605-5p,hsa-miR-761,hsa-miR-4689,hsa-miR-922,hsa-miR-1252-5p,hsa-miR-6077,hsa-miR-214-3p,hsa-miR-4530,hsa-miR-4476,hsa-miR-6809-5p,hsa-miR-4504,hsa-miR-1302,hsa-miR-6857-3p,hsa-miR-6849-5p
hsa_circ_IPCEF1	hsa_circ_IPCEF1	circRNA	NM_001243186	PIM1	protein_coding	hsa-miR-3619-5p,hsa-miR-4690-5p,hsa-miR-6842-5p,hsa-miR-16-5p,hsa-miR-195-5p,hsa-miR-15a-5p,hsa-miR-6838-5p,hsa-miR-6876-5p,hsa-miR-3173-3p,hsa-miR-766-5p,hsa-miR-15b-5p,hsa-miR-4710,hsa-miR-6732-5p,hsa-miR-370-3p,hsa-miR-6891-5p,hsa-miR-7113-5p,hsa-miR-761,hsa-miR-4291,hsa-miR-922,hsa-miR-424-5p,hsa-miR-1252-5p,hsa-miR-6077,hsa-miR-214-3p,hsa-miR-4779,hsa-miR-4530,hsa-miR-4476,hsa-miR-7152-5p,hs…
hsa_circ_0095448	hsa_circ_0095448	circRNA	ENST00000509000	RP5-820B18.3	protein_coding	hsa-miR-3147,hsa-miR-646,hsa-miR-4657,hsa-miR-4491,hsa-miR-769-3p,hsa-miR-6513-5p,hsa-miR-450b-3p
hsa_circ_IPCEF1	hsa_circ_IPCEF1	circRNA	NM_001286134	RIC8A	protein_coding	hsa-miR-4647,hsa-miR-4752,hsa-miR-4646-5p,hsa-miR-4662b,hsa-miR-16-5p,hsa-miR-195-5p,hsa-miR-15a-5p,hsa-miR-4533,hsa-miR-6838-5p,hsa-miR-6876-5p,hsa-miR-3166,hsa-miR-3173-3p,hsa-miR-15b-5p,hsa-miR-204-3p,hsa-miR-497-5p,hsa-miR-4426,hsa-miR-424-5p,hsa-miR-4762-3p,hsa-miR-7114-5p,hsa-miR-4476
hsa_circ_IPCEF1	hsa_circ_IPCEF1	circRNA	NM_003827	NAPA	protein_coding	hsa-miR-3619-5p,hsa-miR-608,hsa-miR-6842-5p,hsa-miR-4298,hsa-miR-4533,hsa-miR-4685-5p,hsa-miR-4505,hsa-miR-3173-3p,hsa-miR-9500,hsa-miR-6732-5p,hsa-miR-6891-5p,hsa-miR-6787-3p,hsa-miR-5787,hsa-miR-761,hsa-miR-922,hsa-miR-3918,hsa-miR-4779,hsa-miR-6837-5p,hsa-miR-4530,hsa-miR-6809-5p,hsa-miR-4651,hsa-miR-6752-5p,hsa-miR-3921,hsa-miR-7110-5p,hsa-miR-4653-5p
hsa_circ_0095448	hsa_circ_0095448	circRNA	NM_002777	PRTN3	protein_coding	hsa-miR-6887-5p,hsa-miR-558,hsa-miR-4725-3p,hsa-miR-6795-5p,hsa-miR-4271,hsa-miR-6077,hsa-miR-6780b-5p
hsa_circ_IPCEF1	hsa_circ_IPCEF1	circRNA	NM_176812	CHMP4B	protein_coding	hsa-miR-3619-5p,hsa-miR-4690-5p,hsa-miR-6894-3p,hsa-miR-548g-3p,hsa-miR-6858-5p,hsa-miR-6842-5p,hsa-miR-16-5p,hsa-miR-195-5p,hsa-miR-6838-5p,hsa-miR-552-3p,hsa-miR-3134,hsa-miR-3120-3p,hsa-miR-125a-3p,hsa-miR-766-5p,hsa-miR-15b-5p,hsa-miR-4710,hsa-miR-6732-5p,hsa-miR-497-5p,hsa-miR-4689,hsa-miR-424-5p,hsa-miR-3918,hsa-miR-214-3p,hsa-miR-6809-5p,hsa-miR-6752-5p,hsa-miR-6747-3p,hsa-miR-7110-5p
hsa_circ_IPCEF1	hsa_circ_IPCEF1	circRNA	NM_023927	GRAMD3	protein_coding	hsa-miR-3619-5p,hsa-miR-5589-5p,hsa-miR-545-3p,hsa-miR-141-5p,hsa-miR-16-5p,hsa-miR-195-5p,hsa-miR-15a-5p,hsa-miR-501-5p,hsa-miR-4685-5p,hsa-miR-6838-5p,hsa-miR-552-3p,hsa-miR-4505,hsa-miR-3120-3p,hsa-miR-4742-5p,hsa-miR-4742-3p,hsa-miR-125a-3p,hsa-miR-15b-5p,hsa-miR-761,hsa-miR-424-5p,hsa-miR-214-3p,hsa-miR-5706,hsa-miR-4779,hsa-miR-6837-5p,hsa-miR-4530
hsa_circ_0095448	hsa_circ_0095448	circRNA	NM_021907	DTNB	protein_coding	hsa-miR-6798-5p,hsa-miR-4725-3p,hsa-miR-3125,hsa-miR-4271,hsa-miR-6859-5p,hsa-miR-6880-5p,hsa-miR-3916,hsa-miR-625-5p,hsa-miR-6780b-5p
hsa_circ_0057691	hsa_circ_0057691	circRNA	NM_020366	RPGRIP1	protein_coding	hsa-miR-218-2-3p,hsa-miR-218-1-3p
hsa_circ_IPCEF1	hsa_circ_IPCEF1	circRNA	NM_001005184	OR6K6	protein_coding	hsa-miR-3681-5p,hsa-miR-16-5p,hsa-miR-195-5p,hsa-miR-15a-5p,hsa-miR-4533,hsa-miR-130b-5p,hsa-miR-6838-5p,hsa-miR-6876-5p,hsa-miR-432-3p,hsa-miR-552-3p,hsa-miR-8056,hsa-miR-3120-3p,hsa-miR-3173-3p,hsa-miR-15b-5p,hsa-miR-6891-5p,hsa-miR-497-5p,hsa-miR-592,hsa-miR-4312,hsa-miR-3918,hsa-miR-4476,hsa-miR-6809-5p,hsa-miR-892a,hsa-miR-6849-5p
hsa_circ_IPCEF1	hsa_circ_IPCEF1	circRNA	NM_033179	OR51B4	protein_coding	hsa-miR-3619-5p,hsa-miR-16-5p,hsa-miR-195-5p,hsa-miR-15a-5p,hsa-miR-4701-3p,hsa-miR-1262,hsa-miR-216a-3p,hsa-miR-6838-5p,hsa-miR-6736-5p,hsa-miR-766-5p,hsa-miR-128-3p,hsa-miR-15b-5p,hsa-miR-497-5p,hsa-miR-761,hsa-miR-424-5p,hsa-miR-214-3p,hsa-miR-1257,hsa-miR-3681-3p,hsa-miR-3921,hsa-miR-4653-5p
hsa_circRNA_100721	hsa_circ_0020396	circRNA	NM_001031692	LRRC17	protein_coding	hsa-miR-545-5p,hsa-miR-103a-3p,hsa-miR-107,hsa-miR-30e-5p,hsa-miR-516a-3p,hsa-miR-516b-3p,hsa-miR-30c-5p,hsa-miR-30a-5p,hsa-miR-21-3p,hsa-miR-30b-5p,hsa-miR-30d-5p
hsa_circ_IPCEF1	hsa_circ_IPCEF1	circRNA	NM_033028	BBS4	protein_coding	hsa-miR-3619-5p,hsa-miR-4690-5p,hsa-miR-4533,hsa-miR-6891-3p,hsa-miR-4685-5p,hsa-miR-6876-5p,hsa-miR-3166,hsa-miR-4742-3p,hsa-miR-640,hsa-miR-6787-3p,hsa-miR-761,hsa-miR-4291,hsa-miR-5586-5p,hsa-miR-922,hsa-miR-214-3p,hsa-miR-5706,hsa-miR-4476,hsa-miR-892a,hsa-miR-3692-5p,hsa-miR-4753-3p
hsa_circ_IPCEF1	hsa_circ_IPCEF1	circRNA	UC010CUM.2	DQ580766	protein_coding	hsa-miR-3619-5p,hsa-miR-16-5p,hsa-miR-195-5p,hsa-miR-15a-5p,hsa-miR-4533,hsa-miR-130b-5p,hsa-miR-6838-5p,hsa-miR-15b-5p,hsa-miR-9500,hsa-miR-497-5p,hsa-miR-761,hsa-miR-4676-3p,hsa-miR-4291,hsa-miR-922,hsa-miR-452-5p,hsa-miR-424-5p,hsa-miR-1252-5p,hsa-miR-214-3p,hsa-miR-4436b-5p,hsa-miR-3692-5p,hsa-miR-892c-3p,hsa-miR-6873-3p
hsa_circRNA_074530	hsa_circ_0074530	circRNA	NM_001007090	C8orf48	protein_coding	hsa-miR-515-3p,hsa-miR-1271-3p,hsa-miR-519e-3p,hsa-miR-33b-3p,hsa-miR-2116-5p
hsa_circ_0021549	hsa_circ_0021549	circRNA	NM_004939	DDX1	protein_coding	hsa-miR-452-5p,hsa-miR-429,hsa-miR-200c-3p
hsa_circ_IPCEF1	hsa_circ_IPCEF1	circRNA	NM_181790	GPR142	protein_coding	hsa-miR-3619-5p,hsa-miR-3691-5p,hsa-miR-6776-5p,hsa-miR-6895-3p,hsa-miR-608,hsa-miR-15a-5p,hsa-miR-4701-3p,hsa-miR-1262,hsa-miR-6838-5p,hsa-miR-432-3p,hsa-miR-3166,hsa-miR-6736-5p,hsa-miR-15b-5p,hsa-miR-9500,hsa-miR-889-5p,hsa-miR-510-5p,hsa-miR-497-5p,hsa-miR-761,hsa-miR-424-5p,hsa-miR-7114-5p,hsa-miR-214-3p,hsa-miR-4779,hsa-miR-548av-3p,hsa-miR-4530,hsa-miR-3692-5p,hsa-miR-1302
hsa_circ_0021549	hsa_circ_0021549	circRNA	NM_001206920	SLC35F4	protein_coding	hsa-miR-574-5p,hsa-miR-429,hsa-miR-200c-3p
hsa_circ_0057691	hsa_circ_0057691	circRNA	NM_017615	NSMCE4A	protein_coding	hsa-miR-154-3p,hsa-miR-487a-3p
hsa_circ_IPCEF1	hsa_circ_IPCEF1	circRNA	NM_017602	OTUD5	protein_coding	hsa-miR-6818-3p,hsa-miR-6895-3p,hsa-miR-608,hsa-miR-6858-5p,hsa-miR-545-3p,hsa-miR-4646-5p,hsa-miR-16-5p,hsa-miR-195-5p,hsa-miR-15a-5p,hsa-miR-4533,hsa-miR-6838-5p,hsa-miR-552-3p,hsa-miR-3173-3p,hsa-miR-125a-3p,hsa-miR-15b-5p,hsa-miR-9500,hsa-miR-4710,hsa-miR-370-3p,hsa-miR-6891-5p,hsa-miR-204-3p,hsa-miR-4689,hsa-miR-424-5p,hsa-miR-7114-5p,hsa-miR-4779,hsa-miR-4651,hsa-miR-3692-5p,hsa-miR-3921,hs…
hsa_circ_IPCEF1	hsa_circ_IPCEF1	circRNA	NM_001004728	OR5A1	protein_coding	hsa-miR-5589-5p,hsa-miR-16-5p,hsa-miR-195-5p,hsa-miR-15a-5p,hsa-miR-4646-3p,hsa-miR-6838-5p,hsa-miR-6876-5p,hsa-miR-432-3p,hsa-miR-3166,hsa-miR-766-5p,hsa-miR-15b-5p,hsa-miR-889-5p,hsa-miR-3605-5p,hsa-miR-497-5p,hsa-miR-4512,hsa-miR-922,hsa-miR-424-5p,hsa-miR-5706,hsa-miR-4779,hsa-miR-4476,hsa-miR-6857-3p,hsa-miR-4753-3p,hsa-miR-4782-5p
hsa_circ_IPCEF1	hsa_circ_IPCEF1	circRNA	NM_001970	EIF5A	protein_coding	hsa-miR-608,hsa-miR-6842-5p,hsa-miR-16-5p,hsa-miR-195-5p,hsa-miR-15a-5p,hsa-miR-4685-5p,hsa-miR-6838-5p,hsa-miR-15b-5p,hsa-miR-9500,hsa-miR-6732-5p,hsa-miR-7113-5p,hsa-miR-497-5p,hsa-miR-424-5p,hsa-miR-4762-3p,hsa-miR-3918,hsa-miR-4779,hsa-miR-6837-5p,hsa-miR-4651,hsa-miR-6752-5p,hsa-miR-7110-5p
hsa_circ_IPCEF1	hsa_circ_IPCEF1	circRNA	NM_030904	OR2T1	protein_coding	hsa-miR-3619-5p,hsa-miR-4647,hsa-miR-6858-5p,hsa-miR-545-3p,hsa-miR-141-5p,hsa-miR-16-5p,hsa-miR-195-5p,hsa-miR-15a-5p,hsa-miR-4685-5p,hsa-miR-6838-5p,hsa-miR-766-5p,hsa-miR-15b-5p,hsa-miR-640,hsa-miR-6732-5p,hsa-miR-3605-5p,hsa-miR-497-5p,hsa-miR-761,hsa-miR-3074-5p,hsa-miR-4291,hsa-miR-5586-5p,hsa-miR-4689,hsa-miR-424-5p,hsa-miR-214-3p,hsa-miR-6837-5p,hsa-miR-4530,hsa-miR-3692-5p,hsa-miR-6747-3p
hsa_circ_IPCEF1	hsa_circ_IPCEF1	circRNA	NM_001564	ING2	protein_coding	hsa-miR-3619-5p,hsa-miR-3681-5p,hsa-miR-4298,hsa-miR-16-5p,hsa-miR-3692-3p,hsa-miR-195-5p,hsa-miR-15a-5p,hsa-miR-6838-5p,hsa-miR-6876-5p,hsa-miR-552-3p,hsa-miR-4742-3p,hsa-miR-125a-3p,hsa-miR-15b-5p,hsa-miR-497-5p,hsa-miR-761,hsa-miR-1266-3p,hsa-miR-5089-3p,hsa-miR-424-5p,hsa-miR-214-3p,hsa-miR-4476,hsa-miR-1257,hsa-miR-7152-5p,hsa-miR-1302,hsa-miR-6849-5p,hsa-miR-4645-3p
hsa_circ_IPCEF1	hsa_circ_IPCEF1	circRNA	NM_002790	PSMA5	protein_coding	hsa-miR-4314,hsa-miR-6837-3p,hsa-miR-548g-3p,hsa-miR-6858-5p,hsa-miR-545-3p,hsa-miR-4646-5p,hsa-miR-4298,hsa-miR-16-5p,hsa-miR-195-5p,hsa-miR-15a-5p,hsa-miR-4701-3p,hsa-miR-6891-3p,hsa-miR-1262,hsa-miR-130b-5p,hsa-miR-216a-3p,hsa-miR-6838-5p,hsa-miR-4505,hsa-miR-4742-3p,hsa-miR-6736-5p,hsa-miR-766-5p,hsa-miR-128-3p,hsa-miR-15b-5p,hsa-miR-1468-3p,hsa-miR-6732-5p,hsa-miR-889-5p,hsa-miR-5787,hsa-miR…
hsa_circ_IPCEF1	hsa_circ_IPCEF1	circRNA	NM_174977	SEC14L4	protein_coding	hsa-miR-3619-5p,hsa-miR-4314,hsa-miR-6776-5p,hsa-miR-608,hsa-miR-4646-5p,hsa-miR-4298,hsa-miR-4662b,hsa-miR-16-5p,hsa-miR-195-5p,hsa-miR-15a-5p,hsa-miR-4701-3p,hsa-miR-1262,hsa-miR-6838-5p,hsa-miR-432-3p,hsa-miR-552-3p,hsa-miR-6736-5p,hsa-miR-125a-3p,hsa-miR-15b-5p,hsa-miR-6787-3p,hsa-miR-204-3p,hsa-miR-497-5p,hsa-miR-761,hsa-miR-3074-5p,hsa-miR-922,hsa-miR-1266-3p,hsa-miR-424-5p,hsa-miR-214-3p,h…
hsa_circ_IPCEF1	hsa_circ_IPCEF1	circRNA	NM_014278	HSPA4L	protein_coding	hsa-miR-3619-5p,hsa-miR-4647,hsa-miR-1323,hsa-miR-545-3p,hsa-miR-4662b,hsa-miR-16-5p,hsa-miR-195-5p,hsa-miR-15a-5p,hsa-miR-4782-3p,hsa-miR-501-5p,hsa-miR-6838-5p,hsa-miR-15b-5p,hsa-miR-497-5p,hsa-miR-761,hsa-miR-4426,hsa-miR-6766-3p,hsa-miR-424-5p,hsa-miR-214-3p,hsa-miR-548av-3p,hsa-miR-3692-5p,hsa-miR-3921,hsa-miR-4653-5p
hsa_circ_IPCEF1	hsa_circ_IPCEF1	circRNA	NM_080618	CTCFL	protein_coding	hsa-miR-608,hsa-miR-6858-5p,hsa-miR-545-3p,hsa-miR-4646-5p,hsa-miR-3692-3p,hsa-miR-4685-5p,hsa-miR-548e-5p,hsa-miR-370-3p,hsa-miR-204-3p,hsa-miR-3074-5p,hsa-miR-5586-5p,hsa-miR-4689,hsa-miR-592,hsa-miR-7114-5p,hsa-miR-548av-3p,hsa-miR-6837-5p,hsa-miR-1257,hsa-miR-4651,hsa-miR-3692-5p,hsa-miR-6873-3p
hsa_circ_IPCEF1	hsa_circ_IPCEF1	circRNA	NM_003598	TEAD2	protein_coding	hsa-miR-6837-3p,hsa-miR-608,hsa-miR-6842-5p,hsa-miR-494-5p,hsa-miR-4646-5p,hsa-miR-4533,hsa-miR-501-5p,hsa-miR-4685-5p,hsa-miR-6876-5p,hsa-miR-766-5p,hsa-miR-410-5p,hsa-miR-5787,hsa-miR-204-3p,hsa-miR-1266-3p,hsa-miR-1252-5p,hsa-miR-3918,hsa-miR-6837-5p,hsa-miR-4476,hsa-miR-4651,hsa-miR-6752-5p,hsa-miR-3921,hsa-miR-7110-5p,hsa-miR-4653-5p
hsa_circ_IPCEF1	hsa_circ_IPCEF1	circRNA	NM_145648	SLC15A4	protein_coding	hsa-miR-4298,hsa-miR-16-5p,hsa-miR-195-5p,hsa-miR-15a-5p,hsa-miR-4668-3p,hsa-miR-4533,hsa-miR-6838-5p,hsa-miR-6876-5p,hsa-miR-3120-3p,hsa-miR-4742-5p,hsa-miR-125a-3p,hsa-miR-15b-5p,hsa-miR-889-5p,hsa-miR-497-5p,hsa-miR-761,hsa-miR-922,hsa-miR-1266-3p,hsa-miR-424-5p,hsa-miR-1252-5p,hsa-miR-4476,hsa-miR-1302
hsa_circ_IPCEF1	hsa_circ_IPCEF1	circRNA	NM_020695	REXO1	protein_coding	hsa-miR-5589-5p,hsa-miR-608,hsa-miR-4298,hsa-miR-16-5p,hsa-miR-15a-5p,hsa-miR-6838-5p,hsa-miR-4505,hsa-miR-15b-5p,hsa-miR-4710,hsa-miR-5787,hsa-miR-497-5p,hsa-miR-4676-3p,hsa-miR-4291,hsa-miR-4689,hsa-miR-452-5p,hsa-miR-424-5p,hsa-miR-6077,hsa-miR-1302
hsa_circ_IPCEF1	hsa_circ_IPCEF1	circRNA	NM_052972	LRG1	protein_coding	hsa-miR-4314,hsa-miR-4647,hsa-miR-4646-5p,hsa-miR-4662b,hsa-miR-4533,hsa-miR-4685-5p,hsa-miR-6876-5p,hsa-miR-432-3p,hsa-miR-552-3p,hsa-miR-3134,hsa-miR-4505,hsa-miR-5787,hsa-miR-204-3p,hsa-miR-4426,hsa-miR-1298-3p,hsa-miR-6837-5p,hsa-miR-4476,hsa-miR-6747-3p
hsa_circ_IPCEF1	hsa_circ_IPCEF1	circRNA	NM_005582	CD180	protein_coding	hsa-miR-4314,hsa-miR-608,hsa-miR-6842-5p,hsa-miR-16-5p,hsa-miR-3692-3p,hsa-miR-195-5p,hsa-miR-15a-5p,hsa-miR-4646-3p,hsa-miR-216a-3p,hsa-miR-6838-5p,hsa-miR-128-3p,hsa-miR-15b-5p,hsa-miR-497-5p,hsa-miR-922,hsa-miR-424-5p,hsa-miR-4530,hsa-miR-3681-3p,hsa-miR-4651,hsa-miR-6857-3p,hsa-miR-6752-5p,hsa-miR-7110-5p
hsa_circ_IPCEF1	hsa_circ_IPCEF1	circRNA	NM_001005500	OR4M1	protein_coding	hsa-miR-4314,hsa-miR-433-3p,hsa-miR-4646-5p,hsa-miR-141-5p,hsa-miR-16-5p,hsa-miR-195-5p,hsa-miR-15a-5p,hsa-miR-6838-5p,hsa-miR-6876-5p,hsa-miR-432-3p,hsa-miR-3134,hsa-miR-3173-3p,hsa-miR-4742-5p,hsa-miR-15b-5p,hsa-miR-9500,hsa-miR-6891-5p,hsa-miR-889-5p,hsa-miR-204-3p,hsa-miR-497-5p,hsa-miR-922,hsa-miR-6077,hsa-miR-4779,hsa-miR-4476
hsa_circ_IPCEF1	hsa_circ_IPCEF1	circRNA	NM_001031710	KLHL7	protein_coding	hsa-miR-6837-3p,hsa-miR-4647,hsa-miR-1323,hsa-miR-3681-5p,hsa-miR-6858-5p,hsa-miR-433-3p,hsa-miR-4662b,hsa-miR-4533,hsa-miR-501-5p,hsa-miR-216a-3p,hsa-miR-6876-5p,hsa-miR-8056,hsa-miR-128-3p,hsa-miR-4689,hsa-miR-4426,hsa-miR-1252-5p,hsa-miR-4476,hsa-miR-6857-3p,hsa-miR-6849-5p
hsa_circ_0057691	hsa_circ_0057691	circRNA	NM_000940	PON3	protein_coding	hsa-miR-154-3p,hsa-miR-487a-3p
hsa_circ_IPCEF1	hsa_circ_IPCEF1	circRNA	NM_013938	OR10H3	protein_coding	hsa-miR-3619-5p,hsa-miR-4647,hsa-miR-1323,hsa-miR-6842-5p,hsa-miR-4662b,hsa-miR-4533,hsa-miR-4701-3p,hsa-miR-1262,hsa-miR-216a-3p,hsa-miR-6876-5p,hsa-miR-6736-5p,hsa-miR-128-3p,hsa-miR-6732-5p,hsa-miR-3605-5p,hsa-miR-761,hsa-miR-4291,hsa-miR-922,hsa-miR-4426,hsa-miR-1252-5p,hsa-miR-4499,hsa-miR-214-3p,hsa-miR-4476,hsa-miR-3692-5p,hsa-miR-6752-5p,hsa-miR-4645-3p,hsa-miR-7110-5p
hsa_circ_IPCEF1	hsa_circ_IPCEF1	circRNA	NM_015001	SPEN	protein_coding	hsa-miR-3619-5p,hsa-miR-5589-5p,hsa-miR-6837-3p,hsa-miR-1323,hsa-miR-608,hsa-miR-6842-5p,hsa-miR-494-5p,hsa-miR-4646-5p,hsa-miR-16-5p,hsa-miR-3692-3p,hsa-miR-195-5p,hsa-miR-15a-5p,hsa-miR-552-3p,hsa-miR-4505,hsa-miR-15b-5p,hsa-miR-323b-5p,hsa-miR-410-5p,hsa-miR-204-3p,hsa-miR-497-5p,hsa-miR-761,hsa-miR-3074-5p,hsa-miR-4291,hsa-miR-922,hsa-miR-1266-3p,hsa-miR-424-5p,hsa-miR-6077,hsa-miR-214-3p,hsa…
hsa_circ_IPCEF1	hsa_circ_IPCEF1	circRNA	NM_031859	PCDHA10	protein_coding	hsa-miR-6837-3p,hsa-miR-494-5p,hsa-miR-141-5p,hsa-miR-16-5p,hsa-miR-195-5p,hsa-miR-15a-5p,hsa-miR-6838-5p,hsa-miR-3166,hsa-miR-4505,hsa-miR-125a-3p,hsa-miR-15b-5p,hsa-miR-323b-5p,hsa-miR-410-5p,hsa-miR-5787,hsa-miR-497-5p,hsa-miR-761,hsa-miR-4291,hsa-miR-5586-5p,hsa-miR-922,hsa-miR-424-5p,hsa-miR-4762-3p,hsa-miR-3918,hsa-miR-4499,hsa-miR-5706,hsa-miR-4711-3p,hsa-miR-4530,hsa-miR-6857-3p
hsa_circ_0057691	hsa_circ_0057691	circRNA	NM_033125	SLC22A16	protein_coding	hsa-miR-30c-1-3p,hsa-miR-30c-2-3p
hsa_circ_IPCEF1	hsa_circ_IPCEF1	circRNA	NM_001199577	GIMAP1-GIMAP5	protein_coding	hsa-miR-3619-5p,hsa-miR-4690-5p,hsa-miR-608,hsa-miR-141-5p,hsa-miR-16-5p,hsa-miR-195-5p,hsa-miR-15a-5p,hsa-miR-6838-5p,hsa-miR-3166,hsa-miR-3120-3p,hsa-miR-766-5p,hsa-miR-15b-5p,hsa-miR-7113-5p,hsa-miR-497-5p,hsa-miR-424-5p,hsa-miR-214-3p,hsa-miR-3921,hsa-miR-4653-5p
hsa_circ_IPCEF1	hsa_circ_IPCEF1	circRNA	NM_001005238	OR51G2	protein_coding	hsa-miR-3619-5p,hsa-miR-4690-5p,hsa-miR-6894-3p,hsa-miR-608,hsa-miR-16-5p,hsa-miR-195-5p,hsa-miR-15a-5p,hsa-miR-4533,hsa-miR-216a-3p,hsa-miR-6838-5p,hsa-miR-6876-5p,hsa-miR-3134,hsa-miR-15b-5p,hsa-miR-7113-5p,hsa-miR-3605-5p,hsa-miR-497-5p,hsa-miR-761,hsa-miR-4291,hsa-miR-4512,hsa-miR-424-5p,hsa-miR-6077,hsa-miR-214-3p,hsa-miR-4476,hsa-miR-1257,hsa-miR-4651,hsa-miR-4645-3p
hsa_circRNA_074530	hsa_circ_0074530	circRNA	NM_001099697	RSPH10B2	protein_coding	hsa-miR-6843-3p,hsa-miR-194-3p,hsa-miR-5586-5p,hsa-miR-6848-3p
hsa_circ_IPCEF1	hsa_circ_IPCEF1	circRNA	NM_006329	FBLN5	protein_coding	hsa-miR-3619-5p,hsa-miR-608,hsa-miR-6842-5p,hsa-miR-216a-3p,hsa-miR-552-3p,hsa-miR-3120-3p,hsa-miR-125a-3p,hsa-miR-128-3p,hsa-miR-370-3p,hsa-miR-761,hsa-miR-4291,hsa-miR-592,hsa-miR-1252-5p,hsa-miR-6077,hsa-miR-214-3p,hsa-miR-892a,hsa-miR-4651,hsa-miR-6752-5p,hsa-miR-6873-3p,hsa-miR-7110-5p
hsa_circ_IPCEF1	hsa_circ_IPCEF1	circRNA	NM_018457	PRR13	protein_coding	hsa-miR-3619-5p,hsa-miR-4647,hsa-miR-608,hsa-miR-6842-5p,hsa-miR-4662b,hsa-miR-16-5p,hsa-miR-3692-3p,hsa-miR-195-5p,hsa-miR-15a-5p,hsa-miR-6838-5p,hsa-miR-3173-3p,hsa-miR-15b-5p,hsa-miR-4710,hsa-miR-6732-5p,hsa-miR-370-3p,hsa-miR-6891-5p,hsa-miR-510-5p,hsa-miR-497-5p,hsa-miR-761,hsa-miR-424-5p,hsa-miR-214-3p,hsa-miR-4651,hsa-miR-3692-5p,hsa-miR-6752-5p,hsa-miR-6747-3p,hsa-miR-7110-5p
hsa_circRNA_100721	hsa_circ_0020396	circRNA	NM_002923	RGS2	protein_coding	hsa-miR-22-3p,hsa-miR-370-5p,hsa-miR-128-3p,hsa-miR-216a-3p,hsa-miR-30e-5p,hsa-miR-516a-3p,hsa-miR-516b-3p,hsa-miR-205-3p,hsa-miR-30c-5p,hsa-miR-30a-5p,hsa-miR-30b-5p,hsa-miR-30d-5p
hsa_circ_IPCEF1	hsa_circ_IPCEF1	circRNA	NM_001267	CHAD	protein_coding	hsa-miR-5589-5p,hsa-miR-4647,hsa-miR-6776-5p,hsa-miR-6895-3p,hsa-miR-608,hsa-miR-545-3p,hsa-miR-4662b,hsa-miR-4533,hsa-miR-6838-5p,hsa-miR-6876-5p,hsa-miR-4505,hsa-miR-3120-3p,hsa-miR-5787,hsa-miR-4291,hsa-miR-922,hsa-miR-4426,hsa-miR-4762-3p,hsa-miR-4476,hsa-miR-6809-5p,hsa-miR-4651,hsa-miR-3692-5p
hsa_circ_IPCEF1	hsa_circ_IPCEF1	circRNA	NM_006659	TUBGCP2	protein_coding	hsa-miR-3619-5p,hsa-miR-3692-3p,hsa-miR-501-5p,hsa-miR-4685-5p,hsa-miR-6876-5p,hsa-miR-3166,hsa-miR-3173-3p,hsa-miR-548e-5p,hsa-miR-766-5p,hsa-miR-370-3p,hsa-miR-6891-5p,hsa-miR-7113-5p,hsa-miR-761,hsa-miR-3074-5p,hsa-miR-4291,hsa-miR-1266-3p,hsa-miR-3918,hsa-miR-214-3p,hsa-miR-4436b-5p,hsa-miR-4779,hsa-miR-548av-3p,hsa-miR-6837-5p,hsa-miR-4504,hsa-miR-6893-3p
hsa_circ_IPCEF1	hsa_circ_IPCEF1	circRNA	NM_000139	MS4A2	protein_coding	hsa-miR-3619-5p,hsa-miR-6837-3p,hsa-miR-4690-5p,hsa-miR-548g-3p,hsa-miR-3691-5p,hsa-miR-16-5p,hsa-miR-195-5p,hsa-miR-15a-5p,hsa-miR-4782-3p,hsa-miR-216a-3p,hsa-miR-6838-5p,hsa-miR-432-3p,hsa-miR-552-3p,hsa-miR-3134,hsa-miR-4505,hsa-miR-3173-3p,hsa-miR-4742-5p,hsa-miR-4742-3p,hsa-miR-128-3p,hsa-miR-15b-5p,hsa-miR-6891-5p,hsa-miR-5787,hsa-miR-497-5p,hsa-miR-761,hsa-miR-922,hsa-miR-6766-3p,hsa-miR-4…
hsa_circ_IPCEF1	hsa_circ_IPCEF1	circRNA	NM_004469	FIGF	protein_coding	hsa-miR-1323,hsa-miR-4646-5p,hsa-miR-16-5p,hsa-miR-195-5p,hsa-miR-6891-3p,hsa-miR-6838-5p,hsa-miR-3120-3p,hsa-miR-7113-5p,hsa-miR-204-3p,hsa-miR-497-5p,hsa-miR-6853-3p,hsa-miR-424-5p,hsa-miR-6072,hsa-miR-5706,hsa-miR-1257,hsa-miR-3921,hsa-miR-4645-3p,hsa-miR-4653-5p
hsa_circ_IPCEF1	hsa_circ_IPCEF1	circRNA	NM_001457	FLNB	protein_coding	hsa-miR-6894-3p,hsa-miR-6858-5p,hsa-miR-545-3p,hsa-miR-6842-5p,hsa-miR-16-5p,hsa-miR-195-5p,hsa-miR-15a-5p,hsa-miR-6838-5p,hsa-miR-6876-5p,hsa-miR-4505,hsa-miR-3120-3p,hsa-miR-4742-5p,hsa-miR-548e-5p,hsa-miR-15b-5p,hsa-miR-510-5p,hsa-miR-5787,hsa-miR-497-5p,hsa-miR-4689,hsa-miR-4312,hsa-miR-424-5p,hsa-miR-6077,hsa-miR-5706,hsa-miR-4436b-5p,hsa-miR-4530,hsa-miR-4476,hsa-miR-6752-5p,hsa-miR-3921,hs…
hsa_circ_IPCEF1	hsa_circ_IPCEF1	circRNA	NM_001005164	OR52E2	protein_coding	hsa-miR-3691-5p,hsa-miR-6776-5p,hsa-miR-3681-5p,hsa-miR-4752,hsa-miR-28-3p,hsa-miR-4533,hsa-miR-4701-3p,hsa-miR-6876-5p,hsa-miR-8056,hsa-miR-3173-3p,hsa-miR-6736-5p,hsa-miR-640,hsa-miR-4710,hsa-miR-6891-5p,hsa-miR-3605-5p,hsa-miR-3074-5p,hsa-miR-4779,hsa-miR-4476,hsa-miR-6809-5p,hsa-miR-6849-5p,hsa-miR-4653-5p
hsa_circ_IPCEF1	hsa_circ_IPCEF1	circRNA	NM_001001656	OR9A4	protein_coding	hsa-miR-6894-3p,hsa-miR-433-3p,hsa-miR-16-5p,hsa-miR-195-5p,hsa-miR-15a-5p,hsa-miR-4646-3p,hsa-miR-4685-5p,hsa-miR-6838-5p,hsa-miR-552-3p,hsa-miR-3166,hsa-miR-125a-3p,hsa-miR-15b-5p,hsa-miR-9500,hsa-miR-7113-5p,hsa-miR-3605-5p,hsa-miR-497-5p,hsa-miR-4512,hsa-miR-424-5p,hsa-miR-6837-5p,hsa-miR-892a
hsa_circ_IPCEF1	hsa_circ_IPCEF1	circRNA	NM_138777	MRRF	protein_coding	hsa-miR-6858-5p,hsa-miR-16-5p,hsa-miR-195-5p,hsa-miR-15a-5p,hsa-miR-6838-5p,hsa-miR-552-3p,hsa-miR-4505,hsa-miR-3173-3p,hsa-miR-4742-5p,hsa-miR-125a-3p,hsa-miR-15b-5p,hsa-miR-6891-5p,hsa-miR-5787,hsa-miR-3605-5p,hsa-miR-497-5p,hsa-miR-5586-5p,hsa-miR-4689,hsa-miR-922,hsa-miR-424-5p,hsa-miR-6077,hsa-miR-4779,hsa-miR-4530
hsa_circ_IPCEF1	hsa_circ_IPCEF1	circRNA	NM_016274	PLEKHO1	protein_coding	hsa-miR-5589-5p,hsa-miR-608,hsa-miR-4298,hsa-miR-6891-3p,hsa-miR-6838-5p,hsa-miR-552-3p,hsa-miR-4505,hsa-miR-125a-3p,hsa-miR-5787,hsa-miR-497-5p,hsa-miR-3074-5p,hsa-miR-6072,hsa-miR-4711-3p,hsa-miR-4530,hsa-miR-892a,hsa-miR-4651,hsa-miR-1302,hsa-miR-6873-3p
hsa_circ_IPCEF1	hsa_circ_IPCEF1	circRNA	NM_020457	THAP11	protein_coding	hsa-miR-3619-5p,hsa-miR-4646-5p,hsa-miR-4533,hsa-miR-4685-5p,hsa-miR-216a-3p,hsa-miR-6876-5p,hsa-miR-3173-3p,hsa-miR-766-5p,hsa-miR-128-3p,hsa-miR-6891-5p,hsa-miR-204-3p,hsa-miR-3605-5p,hsa-miR-761,hsa-miR-4291,hsa-miR-1252-5p,hsa-miR-214-3p,hsa-miR-4436b-5p,hsa-miR-6837-5p,hsa-miR-4476,hsa-miR-3681-3p
hsa_circ_0021549	hsa_circ_0021549	circRNA	NM_001686	ATP5B	protein_coding	hsa-miR-452-5p,hsa-miR-429,hsa-miR-200c-3p
hsa_circ_IPCEF1	hsa_circ_IPCEF1	circRNA	NM_014566	OR1D5	protein_coding	hsa-miR-3619-5p,hsa-miR-4314,hsa-miR-6842-5p,hsa-miR-494-5p,hsa-miR-4685-5p,hsa-miR-766-5p,hsa-miR-4710,hsa-miR-6732-5p,hsa-miR-323b-5p,hsa-miR-889-5p,hsa-miR-410-5p,hsa-miR-761,hsa-miR-4689,hsa-miR-592,hsa-miR-1252-5p,hsa-miR-214-3p,hsa-miR-6837-5p,hsa-miR-4476,hsa-miR-1257,hsa-miR-4504,hsa-miR-6752-5p,hsa-miR-6849-5p,hsa-miR-3921,hsa-miR-7110-5p
hsa_circ_IPCEF1	hsa_circ_IPCEF1	circRNA	NM_014287	NOMO1	protein_coding	hsa-miR-3619-5p,hsa-miR-3681-5p,hsa-miR-195-5p,hsa-miR-15a-5p,hsa-miR-216a-3p,hsa-miR-6838-5p,hsa-miR-128-3p,hsa-miR-15b-5p,hsa-miR-9500,hsa-miR-4710,hsa-miR-3605-5p,hsa-miR-497-5p,hsa-miR-761,hsa-miR-4291,hsa-miR-922,hsa-miR-424-5p,hsa-miR-214-3p,hsa-miR-4779,hsa-miR-4530,hsa-miR-4504,hsa-miR-6849-5p,hsa-miR-6841-5p
hsa_circ_IPCEF1	hsa_circ_IPCEF1	circRNA	NM_000128	F11	protein_coding	hsa-miR-16-5p,hsa-miR-3692-3p,hsa-miR-15a-5p,hsa-miR-28-3p,hsa-miR-4668-3p,hsa-miR-145-3p,hsa-miR-216a-3p,hsa-miR-6838-5p,hsa-miR-766-5p,hsa-miR-128-3p,hsa-miR-15b-5p,hsa-miR-497-5p,hsa-miR-3074-5p,hsa-miR-424-5p,hsa-miR-4499,hsa-miR-7114-5p,hsa-miR-3681-3p,hsa-miR-4504
hsa_circ_IPCEF1	hsa_circ_IPCEF1	circRNA	NM_001004067	NOMO3	protein_coding	hsa-miR-3619-5p,hsa-miR-3681-5p,hsa-miR-195-5p,hsa-miR-15a-5p,hsa-miR-216a-3p,hsa-miR-6838-5p,hsa-miR-128-3p,hsa-miR-15b-5p,hsa-miR-9500,hsa-miR-4710,hsa-miR-3605-5p,hsa-miR-497-5p,hsa-miR-761,hsa-miR-4291,hsa-miR-922,hsa-miR-424-5p,hsa-miR-214-3p,hsa-miR-4779,hsa-miR-4530,hsa-miR-4504,hsa-miR-6849-5p,hsa-miR-6841-5p
hsa_circ_IPCEF1	hsa_circ_IPCEF1	circRNA	NM_007108	TCEB2	protein_coding	hsa-miR-3619-5p,hsa-miR-4314,hsa-miR-4690-5p,hsa-miR-6818-3p,hsa-miR-6895-3p,hsa-miR-608,hsa-miR-6842-5p,hsa-miR-16-5p,hsa-miR-4646-3p,hsa-miR-6838-5p,hsa-miR-4505,hsa-miR-15b-5p,hsa-miR-5787,hsa-miR-497-5p,hsa-miR-761,hsa-miR-424-5p,hsa-miR-1298-3p,hsa-miR-214-3p,hsa-miR-4651,hsa-miR-6752-5p,hsa-miR-4753-3p,hsa-miR-7110-5p
hsa_circ_IPCEF1	hsa_circ_IPCEF1	circRNA	NM_001001952	OR5D18	protein_coding	hsa-miR-4314,hsa-miR-4647,hsa-miR-6858-5p,hsa-miR-4298,hsa-miR-4662b,hsa-miR-16-5p,hsa-miR-15a-5p,hsa-miR-216a-3p,hsa-miR-6838-5p,hsa-miR-766-5p,hsa-miR-128-3p,hsa-miR-15b-5p,hsa-miR-3605-5p,hsa-miR-497-5p,hsa-miR-4689,hsa-miR-6077,hsa-miR-4530,hsa-miR-6809-5p,hsa-miR-892a,hsa-miR-1302,hsa-miR-6752-5p
hsa_circ_IPCEF1	hsa_circ_IPCEF1	circRNA	NM_001004487	OR13J1	protein_coding	hsa-miR-3619-5p,hsa-miR-5589-5p,hsa-miR-4690-5p,hsa-miR-6858-5p,hsa-miR-16-5p,hsa-miR-195-5p,hsa-miR-15a-5p,hsa-miR-4668-3p,hsa-miR-4685-5p,hsa-miR-6838-5p,hsa-miR-432-3p,hsa-miR-4505,hsa-miR-3120-3p,hsa-miR-125a-3p,hsa-miR-15b-5p,hsa-miR-9500,hsa-miR-889-5p,hsa-miR-5787,hsa-miR-497-5p,hsa-miR-761,hsa-miR-4689,hsa-miR-424-5p,hsa-miR-6077,hsa-miR-6072,hsa-miR-214-3p,hsa-miR-4779,hsa-miR-6837-5p,hs…
hsa_circ_IPCEF1	hsa_circ_IPCEF1	circRNA	NM_006058	TNIP1	protein_coding	hsa-miR-3619-5p,hsa-miR-6776-5p,hsa-miR-16-5p,hsa-miR-195-5p,hsa-miR-15a-5p,hsa-miR-4533,hsa-miR-6838-5p,hsa-miR-15b-5p,hsa-miR-9500,hsa-miR-6732-5p,hsa-miR-7113-5p,hsa-miR-497-5p,hsa-miR-761,hsa-miR-5586-5p,hsa-miR-4512,hsa-miR-922,hsa-miR-424-5p,hsa-miR-1298-3p,hsa-miR-3918,hsa-miR-214-3p,hsa-miR-4530,hsa-miR-4476
hsa_circ_IPCEF1	hsa_circ_IPCEF1	circRNA	NM_130811	SNAP25	protein_coding	hsa-miR-4752,hsa-miR-608,hsa-miR-545-3p,hsa-miR-6842-5p,hsa-miR-16-5p,hsa-miR-3692-3p,hsa-miR-195-5p,hsa-miR-15a-5p,hsa-miR-28-3p,hsa-miR-6838-5p,hsa-miR-8056,hsa-miR-3120-3p,hsa-miR-766-5p,hsa-miR-15b-5p,hsa-miR-497-5p,hsa-miR-4676-3p,hsa-miR-592,hsa-miR-5089-3p,hsa-miR-452-5p,hsa-miR-424-5p,hsa-miR-7114-5p,hsa-miR-4651,hsa-miR-7110-5p
hsa_circ_IPCEF1	hsa_circ_IPCEF1	circRNA	NM_007184	NISCH	protein_coding	hsa-miR-3619-5p,hsa-miR-16-5p,hsa-miR-195-5p,hsa-miR-15a-5p,hsa-miR-216a-3p,hsa-miR-6838-5p,hsa-miR-3166,hsa-miR-3120-3p,hsa-miR-128-3p,hsa-miR-370-3p,hsa-miR-497-5p,hsa-miR-761,hsa-miR-922,hsa-miR-424-5p,hsa-miR-214-3p,hsa-miR-5706,hsa-miR-4436b-5p,hsa-miR-3681-3p,hsa-miR-4651,hsa-miR-4782-5p,hsa-miR-6893-3p
hsa_circ_IPCEF1	hsa_circ_IPCEF1	circRNA	ENST00000593290	LINC01101	protein_coding	hsa-miR-4690-5p,hsa-miR-4646-5p,hsa-miR-16-5p,hsa-miR-195-5p,hsa-miR-15a-5p,hsa-miR-4533,hsa-miR-501-5p,hsa-miR-4685-5p,hsa-miR-216a-3p,hsa-miR-6838-5p,hsa-miR-6876-5p,hsa-miR-432-3p,hsa-miR-3134,hsa-miR-4505,hsa-miR-4742-5p,hsa-miR-766-5p,hsa-miR-128-3p,hsa-miR-15b-5p,hsa-miR-9500,hsa-miR-7113-5p,hsa-miR-5787,hsa-miR-204-3p,hsa-miR-3605-5p,hsa-miR-497-5p,hsa-miR-3074-5p,hsa-miR-424-5p,hsa-miR-39…
hsa_circ_IPCEF1	hsa_circ_IPCEF1	circRNA	NM_177437	TAS2R60	protein_coding	hsa-miR-6894-3p,hsa-miR-608,hsa-miR-16-5p,hsa-miR-195-5p,hsa-miR-15a-5p,hsa-miR-4701-3p,hsa-miR-1262,hsa-miR-216a-3p,hsa-miR-6838-5p,hsa-miR-3166,hsa-miR-6736-5p,hsa-miR-15b-5p,hsa-miR-9500,hsa-miR-1468-3p,hsa-miR-922,hsa-miR-424-5p,hsa-miR-4762-3p,hsa-miR-6077,hsa-miR-4711-3p,hsa-miR-548av-3p,hsa-miR-4530,hsa-miR-7152-5p
hsa_circ_IPCEF1	hsa_circ_IPCEF1	circRNA	NM_020933	ZNF317	protein_coding	hsa-miR-3619-5p,hsa-miR-6837-3p,hsa-miR-4647,hsa-miR-6818-3p,hsa-miR-3681-5p,hsa-miR-6858-5p,hsa-miR-494-5p,hsa-miR-4662b,hsa-miR-141-5p,hsa-miR-16-5p,hsa-miR-3692-3p,hsa-miR-195-5p,hsa-miR-15a-5p,hsa-miR-4685-5p,hsa-miR-6838-5p,hsa-miR-432-3p,hsa-miR-3166,hsa-miR-8056,hsa-miR-3173-3p,hsa-miR-766-5p,hsa-miR-15b-5p,hsa-miR-6891-5p,hsa-miR-323b-5p,hsa-miR-410-5p,hsa-miR-497-5p,hsa-miR-761,hsa-miR-4…
hsa_circ_IPCEF1	hsa_circ_IPCEF1	circRNA	NM_152694	ZCCHC5	protein_coding	hsa-miR-3691-5p,hsa-miR-3681-5p,hsa-miR-545-3p,hsa-miR-16-5p,hsa-miR-195-5p,hsa-miR-15a-5p,hsa-miR-216a-3p,hsa-miR-6838-5p,hsa-miR-432-3p,hsa-miR-552-3p,hsa-miR-548e-5p,hsa-miR-125a-3p,hsa-miR-128-3p,hsa-miR-15b-5p,hsa-miR-9500,hsa-miR-497-5p,hsa-miR-424-5p,hsa-miR-3681-3p,hsa-miR-4504,hsa-miR-6849-5p
hsa_circ_IPCEF1	hsa_circ_IPCEF1	circRNA	NM_001005278	OR6N2	protein_coding	hsa-miR-3619-5p,hsa-miR-4647,hsa-miR-545-3p,hsa-miR-433-3p,hsa-miR-4298,hsa-miR-4662b,hsa-miR-16-5p,hsa-miR-195-5p,hsa-miR-15a-5p,hsa-miR-6838-5p,hsa-miR-3120-3p,hsa-miR-3173-3p,hsa-miR-15b-5p,hsa-miR-889-5p,hsa-miR-497-5p,hsa-miR-761,hsa-miR-4426,hsa-miR-424-5p,hsa-miR-1252-5p,hsa-miR-214-3p,hsa-miR-6809-5p,hsa-miR-1302
hsa_circRNA_074530	hsa_circ_0074530	circRNA	NM_001012715	C9orf106	protein_coding	hsa-miR-515-3p,hsa-miR-519e-3p,hsa-miR-33b-3p
hsa_circ_IPCEF1	hsa_circ_IPCEF1	circRNA	NM_001040084	ANXA8	protein_coding	hsa-miR-4647,hsa-miR-6858-5p,hsa-miR-545-3p,hsa-miR-4646-5p,hsa-miR-4533,hsa-miR-4685-5p,hsa-miR-216a-3p,hsa-miR-6876-5p,hsa-miR-4505,hsa-miR-3120-3p,hsa-miR-766-5p,hsa-miR-128-3p,hsa-miR-640,hsa-miR-6787-3p,hsa-miR-5787,hsa-miR-204-3p,hsa-miR-4689,hsa-miR-4426,hsa-miR-1252-5p,hsa-miR-6077,hsa-miR-4499,hsa-miR-6837-5p,hsa-miR-4476,hsa-miR-3681-3p
hsa_circ_IPCEF1	hsa_circ_IPCEF1	circRNA	NM_016034	MRPS2	protein_coding	hsa-miR-3691-5p,hsa-miR-16-5p,hsa-miR-195-5p,hsa-miR-15a-5p,hsa-miR-4685-5p,hsa-miR-6838-5p,hsa-miR-4505,hsa-miR-15b-5p,hsa-miR-5787,hsa-miR-3605-5p,hsa-miR-497-5p,hsa-miR-424-5p,hsa-miR-548av-3p,hsa-miR-6837-5p,hsa-miR-4530,hsa-miR-3692-5p,hsa-miR-6857-3p,hsa-miR-3921,hsa-miR-4653-5p
hsa_circ_IPCEF1	hsa_circ_IPCEF1	circRNA	UC001WDV.4	TRA@	protein_coding	hsa-miR-3619-5p,hsa-miR-608,hsa-miR-6842-5p,hsa-miR-16-5p,hsa-miR-195-5p,hsa-miR-15a-5p,hsa-miR-4533,hsa-miR-6838-5p,hsa-miR-6876-5p,hsa-miR-15b-5p,hsa-miR-6732-5p,hsa-miR-761,hsa-miR-4512,hsa-miR-424-5p,hsa-miR-3918,hsa-miR-214-3p,hsa-miR-4779,hsa-miR-4476,hsa-miR-4504,hsa-miR-4651,hsa-miR-6752-5p,hsa-miR-7110-5p
hsa_circ_IPCEF1	hsa_circ_IPCEF1	circRNA	NM_002135	NR4A1	protein_coding	hsa-miR-3619-5p,hsa-miR-608,hsa-miR-6842-5p,hsa-miR-16-5p,hsa-miR-195-5p,hsa-miR-15a-5p,hsa-miR-4533,hsa-miR-130b-5p,hsa-miR-6838-5p,hsa-miR-4505,hsa-miR-3173-3p,hsa-miR-4742-3p,hsa-miR-125a-3p,hsa-miR-15b-5p,hsa-miR-6891-5p,hsa-miR-497-5p,hsa-miR-761,hsa-miR-424-5p,hsa-miR-6077,hsa-miR-214-3p,hsa-miR-4779,hsa-miR-4530,hsa-miR-7152-5p,hsa-miR-4651,hsa-miR-6752-5p,hsa-miR-7110-5p
hsa_circ_IPCEF1	hsa_circ_IPCEF1	circRNA	NM_001736	C5AR1	protein_coding	hsa-miR-4314,hsa-miR-5589-5p,hsa-miR-6837-3p,hsa-miR-4647,hsa-miR-6776-5p,hsa-miR-608,hsa-miR-6842-5p,hsa-miR-4646-5p,hsa-miR-4533,hsa-miR-4701-3p,hsa-miR-145-3p,hsa-miR-1262,hsa-miR-6876-5p,hsa-miR-8056,hsa-miR-4505,hsa-miR-3173-3p,hsa-miR-4742-5p,hsa-miR-4742-3p,hsa-miR-6736-5p,hsa-miR-640,hsa-miR-9500,hsa-miR-6891-5p,hsa-miR-5787,hsa-miR-204-3p,hsa-miR-1266-3p,hsa-miR-1252-5p,hsa-miR-4779,hsa-…
hsa_circ_IPCEF1	hsa_circ_IPCEF1	circRNA	NM_018354	TMEM74B	protein_coding	hsa-miR-608,hsa-miR-6842-5p,hsa-miR-16-5p,hsa-miR-3692-3p,hsa-miR-195-5p,hsa-miR-15a-5p,hsa-miR-4685-5p,hsa-miR-6838-5p,hsa-miR-15b-5p,hsa-miR-6787-3p,hsa-miR-5787,hsa-miR-497-5p,hsa-miR-922,hsa-miR-424-5p,hsa-miR-3918,hsa-miR-6837-5p,hsa-miR-4651,hsa-miR-6752-5p
hsa_circ_IPCEF1	hsa_circ_IPCEF1	circRNA	NM_001080511	CLEC2L	protein_coding	hsa-miR-3619-5p,hsa-miR-5589-5p,hsa-miR-6776-5p,hsa-miR-608,hsa-miR-6858-5p,hsa-miR-4701-3p,hsa-miR-1262,hsa-miR-4685-5p,hsa-miR-3166,hsa-miR-3173-3p,hsa-miR-6736-5p,hsa-miR-6891-5p,hsa-miR-7113-5p,hsa-miR-4689,hsa-miR-3918,hsa-miR-6837-5p,hsa-miR-6809-5p,hsa-miR-4651,hsa-miR-3692-5p,hsa-miR-6747-3p
hsa_circ_IPCEF1	hsa_circ_IPCEF1	circRNA	NM_173467	MCAT	protein_coding	hsa-miR-3619-5p,hsa-miR-4690-5p,hsa-miR-608,hsa-miR-6858-5p,hsa-miR-6842-5p,hsa-miR-4701-3p,hsa-miR-4685-5p,hsa-miR-6876-5p,hsa-miR-4742-5p,hsa-miR-6732-5p,hsa-miR-761,hsa-miR-4689,hsa-miR-3918,hsa-miR-214-3p,hsa-miR-6837-5p,hsa-miR-4476,hsa-miR-4504,hsa-miR-4651,hsa-miR-6752-5p,hsa-miR-3921,hsa-miR-7110-5p,hsa-miR-4653-5p
hsa_circ_IPCEF1	hsa_circ_IPCEF1	circRNA	NM_001008404	C14orf180	protein_coding	hsa-miR-3619-5p,hsa-miR-5589-5p,hsa-miR-6895-3p,hsa-miR-6842-5p,hsa-miR-4298,hsa-miR-195-5p,hsa-miR-15a-5p,hsa-miR-4782-3p,hsa-miR-4701-3p,hsa-miR-4646-3p,hsa-miR-1262,hsa-miR-4685-5p,hsa-miR-6838-5p,hsa-miR-432-3p,hsa-miR-4505,hsa-miR-6736-5p,hsa-miR-15b-5p,hsa-miR-370-3p,hsa-miR-889-5p,hsa-miR-5787,hsa-miR-497-5p,hsa-miR-761,hsa-miR-3074-5p,hsa-miR-6766-3p,hsa-miR-424-5p,hsa-miR-3918,hsa-miR-21…
hsa_circ_0057691	hsa_circ_0057691	circRNA	UC004DOA.3	GAGE12F	protein_coding	hsa-miR-30c-1-3p,hsa-miR-30c-2-3p
hsa_circ_IPCEF1	hsa_circ_IPCEF1	circRNA	NM_015945	SLC35C2	protein_coding	hsa-miR-3619-5p,hsa-miR-4690-5p,hsa-miR-216a-3p,hsa-miR-4505,hsa-miR-3173-3p,hsa-miR-125a-3p,hsa-miR-128-3p,hsa-miR-370-3p,hsa-miR-6891-5p,hsa-miR-5787,hsa-miR-204-3p,hsa-miR-761,hsa-miR-3074-5p,hsa-miR-214-3p,hsa-miR-4530,hsa-miR-4504,hsa-miR-3921,hsa-miR-6893-3p,hsa-miR-4653-5p
hsa_circ_IPCEF1	hsa_circ_IPCEF1	circRNA	NM_152789	FAM133B	protein_coding	hsa-miR-3619-5p,hsa-miR-4690-5p,hsa-miR-6858-5p,hsa-miR-16-5p,hsa-miR-195-5p,hsa-miR-15a-5p,hsa-miR-216a-3p,hsa-miR-6838-5p,hsa-miR-3120-3p,hsa-miR-4742-5p,hsa-miR-128-3p,hsa-miR-15b-5p,hsa-miR-1468-3p,hsa-miR-889-5p,hsa-miR-6787-3p,hsa-miR-497-5p,hsa-miR-761,hsa-miR-4291,hsa-miR-4689,hsa-miR-424-5p,hsa-miR-214-3p,hsa-miR-892a,hsa-miR-3681-3p,hsa-miR-3692-5p
hsa_circ_0021549	hsa_circ_0021549	circRNA	NM_012071	COMMD3	protein_coding	hsa-miR-29b-1-5p,hsa-miR-553,hsa-miR-429,hsa-miR-200c-3p
hsa_circ_IPCEF1	hsa_circ_IPCEF1	circRNA	NM_001722	POLR3D	protein_coding	hsa-miR-4690-5p,hsa-miR-16-5p,hsa-miR-195-5p,hsa-miR-15a-5p,hsa-miR-6838-5p,hsa-miR-6876-5p,hsa-miR-766-5p,hsa-miR-15b-5p,hsa-miR-370-3p,hsa-miR-3605-5p,hsa-miR-497-5p,hsa-miR-761,hsa-miR-922,hsa-miR-4312,hsa-miR-424-5p,hsa-miR-6077,hsa-miR-3918,hsa-miR-214-3p,hsa-miR-4530,hsa-miR-4476,hsa-miR-3692-5p,hsa-miR-6873-3p,hsa-miR-6893-3p
hsa_circ_IPCEF1	hsa_circ_IPCEF1	circRNA	NM_019557	MTFR1L	protein_coding	hsa-miR-4314,hsa-miR-4647,hsa-miR-6858-5p,hsa-miR-4646-5p,hsa-miR-4662b,hsa-miR-16-5p,hsa-miR-195-5p,hsa-miR-15a-5p,hsa-miR-130b-5p,hsa-miR-6838-5p,hsa-miR-6876-5p,hsa-miR-15b-5p,hsa-miR-4710,hsa-miR-204-3p,hsa-miR-497-5p,hsa-miR-5586-5p,hsa-miR-4689,hsa-miR-424-5p,hsa-miR-3918,hsa-miR-4779,hsa-miR-4711-3p,hsa-miR-4530,hsa-miR-4476,hsa-miR-6809-5p,hsa-miR-4753-3p,hsa-miR-6873-3p
hsa_circ_IPCEF1	hsa_circ_IPCEF1	circRNA	NM_001034837	KCNIP1	protein_coding	hsa-miR-5589-5p,hsa-miR-6818-3p,hsa-miR-6895-3p,hsa-miR-6858-5p,hsa-miR-16-5p,hsa-miR-195-5p,hsa-miR-15a-5p,hsa-miR-6838-5p,hsa-miR-4505,hsa-miR-3120-3p,hsa-miR-15b-5p,hsa-miR-5787,hsa-miR-497-5p,hsa-miR-4291,hsa-miR-4689,hsa-miR-922,hsa-miR-452-5p,hsa-miR-424-5p,hsa-miR-6077,hsa-miR-4499,hsa-miR-5706,hsa-miR-892c-3p,hsa-miR-6857-3p,hsa-miR-4782-5p
hsa_circ_IPCEF1	hsa_circ_IPCEF1	circRNA	NM_198479	TPRX1	protein_coding	hsa-miR-3619-5p,hsa-miR-545-3p,hsa-miR-4646-5p,hsa-miR-16-5p,hsa-miR-195-5p,hsa-miR-15a-5p,hsa-miR-216a-3p,hsa-miR-6838-5p,hsa-miR-3120-3p,hsa-miR-128-3p,hsa-miR-15b-5p,hsa-miR-204-3p,hsa-miR-497-5p,hsa-miR-761,hsa-miR-922,hsa-miR-424-5p,hsa-miR-214-3p,hsa-miR-4530
hsa_circ_IPCEF1	hsa_circ_IPCEF1	circRNA	NM_001280796	GLS2	protein_coding	hsa-miR-6776-5p,hsa-miR-4752,hsa-miR-433-3p,hsa-miR-16-5p,hsa-miR-195-5p,hsa-miR-15a-5p,hsa-miR-4701-3p,hsa-miR-1262,hsa-miR-6838-5p,hsa-miR-6736-5p,hsa-miR-15b-5p,hsa-miR-497-5p,hsa-miR-424-5p,hsa-miR-7114-5p,hsa-miR-5706,hsa-miR-3921,hsa-miR-4782-5p,hsa-miR-6873-3p
hsa_circ_IPCEF1	hsa_circ_IPCEF1	circRNA	NM_001292041	HCLS1	protein_coding	hsa-miR-3619-5p,hsa-miR-6818-3p,hsa-miR-608,hsa-miR-6842-5p,hsa-miR-4646-5p,hsa-miR-4533,hsa-miR-6891-3p,hsa-miR-9500,hsa-miR-6732-5p,hsa-miR-204-3p,hsa-miR-761,hsa-miR-6853-3p,hsa-miR-1252-5p,hsa-miR-6072,hsa-miR-214-3p,hsa-miR-4651,hsa-miR-6752-5p,hsa-miR-7110-5p
hsa_circ_IPCEF1	hsa_circ_IPCEF1	circRNA	NM_001001667	OR6V1	protein_coding	hsa-miR-3619-5p,hsa-miR-4647,hsa-miR-6842-5p,hsa-miR-4662b,hsa-miR-4533,hsa-miR-216a-3p,hsa-miR-6876-5p,hsa-miR-3173-3p,hsa-miR-6732-5p,hsa-miR-6891-5p,hsa-miR-7113-5p,hsa-miR-761,hsa-miR-4676-3p,hsa-miR-4512,hsa-miR-4426,hsa-miR-214-3p,hsa-miR-4530,hsa-miR-4476,hsa-miR-3681-3p,hsa-miR-3692-5p,hsa-miR-892c-3p,hsa-miR-6752-5p,hsa-miR-7110-5p
hsa_circ_IPCEF1	hsa_circ_IPCEF1	circRNA	NM_001004460	OR10A2	protein_coding	hsa-miR-433-3p,hsa-miR-4646-5p,hsa-miR-16-5p,hsa-miR-195-5p,hsa-miR-15a-5p,hsa-miR-4533,hsa-miR-6838-5p,hsa-miR-6876-5p,hsa-miR-552-3p,hsa-miR-3173-3p,hsa-miR-125a-3p,hsa-miR-766-5p,hsa-miR-15b-5p,hsa-miR-4710,hsa-miR-370-3p,hsa-miR-6891-5p,hsa-miR-3605-5p,hsa-miR-497-5p,hsa-miR-424-5p,hsa-miR-4476,hsa-miR-6893-3p
hsa_circ_IPCEF1	hsa_circ_IPCEF1	circRNA	NM_001080835	PRR21	protein_coding	hsa-miR-3691-5p,hsa-miR-16-5p,hsa-miR-195-5p,hsa-miR-15a-5p,hsa-miR-4701-3p,hsa-miR-1262,hsa-miR-6838-5p,hsa-miR-3166,hsa-miR-4742-5p,hsa-miR-6736-5p,hsa-miR-766-5p,hsa-miR-15b-5p,hsa-miR-370-3p,hsa-miR-497-5p,hsa-miR-424-5p,hsa-miR-6077,hsa-miR-4476,hsa-miR-1257,hsa-miR-6893-3p
hsa_circ_IPCEF1	hsa_circ_IPCEF1	circRNA	NM_004693	KRT75	protein_coding	hsa-miR-3619-5p,hsa-miR-4690-5p,hsa-miR-4646-5p,hsa-miR-195-5p,hsa-miR-15a-5p,hsa-miR-4533,hsa-miR-4701-3p,hsa-miR-1262,hsa-miR-6876-5p,hsa-miR-552-3p,hsa-miR-3173-3p,hsa-miR-6736-5p,hsa-miR-15b-5p,hsa-miR-6891-5p,hsa-miR-204-3p,hsa-miR-497-5p,hsa-miR-214-3p,hsa-miR-4779,hsa-miR-4530,hsa-miR-4476,hsa-miR-4504,hsa-miR-3692-5p
hsa_circ_IPCEF1	hsa_circ_IPCEF1	circRNA	NM_003806	HRK	protein_coding	hsa-miR-3619-5p,hsa-miR-4690-5p,hsa-miR-608,hsa-miR-545-3p,hsa-miR-6842-5p,hsa-miR-16-5p,hsa-miR-195-5p,hsa-miR-15a-5p,hsa-miR-4646-3p,hsa-miR-6838-5p,hsa-miR-6876-5p,hsa-miR-3120-3p,hsa-miR-15b-5p,hsa-miR-1468-3p,hsa-miR-497-5p,hsa-miR-761,hsa-miR-214-3p,hsa-miR-5706,hsa-miR-4436b-5p,hsa-miR-4530,hsa-miR-4476,hsa-miR-4651,hsa-miR-6752-5p,hsa-miR-4782-5p,hsa-miR-6873-3p,hsa-miR-7110-5p
hsa_circ_0095448	hsa_circ_0095448	circRNA	NM_003732	EIF4EBP3	protein_coding	hsa-miR-22-3p,hsa-miR-495-5p,hsa-miR-3125,hsa-miR-6859-5p,hsa-miR-6077,hsa-miR-1207-3p,hsa-miR-3916
hsa_circ_IPCEF1	hsa_circ_IPCEF1	circRNA	UC003GSX.4	AX748249	protein_coding	hsa-miR-4314,hsa-miR-5589-5p,hsa-miR-16-5p,hsa-miR-3692-3p,hsa-miR-195-5p,hsa-miR-15a-5p,hsa-miR-6838-5p,hsa-miR-15b-5p,hsa-miR-6891-5p,hsa-miR-889-5p,hsa-miR-3605-5p,hsa-miR-497-5p,hsa-miR-5586-5p,hsa-miR-424-5p,hsa-miR-1298-3p,hsa-miR-6077,hsa-miR-4779,hsa-miR-4530
hsa_circ_IPCEF1	hsa_circ_IPCEF1	circRNA	NM_016817	OAS2	protein_coding	hsa-miR-3619-5p,hsa-miR-3691-5p,hsa-miR-6776-5p,hsa-miR-3681-5p,hsa-miR-608,hsa-miR-6842-5p,hsa-miR-16-5p,hsa-miR-4533,hsa-miR-4701-3p,hsa-miR-4646-3p,hsa-miR-145-3p,hsa-miR-1262,hsa-miR-130b-5p,hsa-miR-3120-3p,hsa-miR-3173-3p,hsa-miR-6736-5p,hsa-miR-766-5p,hsa-miR-9500,hsa-miR-6891-5p,hsa-miR-3605-5p,hsa-miR-761,hsa-miR-4291,hsa-miR-1252-5p,hsa-miR-7114-5p,hsa-miR-214-3p,hsa-miR-4651,hsa-miR-369…
hsa_circ_IPCEF1	hsa_circ_IPCEF1	circRNA	NM_001145014	RFPL4A	protein_coding	hsa-miR-3619-5p,hsa-miR-4690-5p,hsa-miR-6818-3p,hsa-miR-6895-3p,hsa-miR-141-5p,hsa-miR-6891-3p,hsa-miR-145-3p,hsa-miR-4685-5p,hsa-miR-216a-3p,hsa-miR-3134,hsa-miR-128-3p,hsa-miR-6787-3p,hsa-miR-510-5p,hsa-miR-761,hsa-miR-214-3p,hsa-miR-4436b-5p,hsa-miR-6837-5p,hsa-miR-3681-3p
hsa_circ_IPCEF1	hsa_circ_IPCEF1	circRNA	NM_001005467	OR8B3	protein_coding	hsa-miR-3681-5p,hsa-miR-545-3p,hsa-miR-4298,hsa-miR-141-5p,hsa-miR-16-5p,hsa-miR-195-5p,hsa-miR-15a-5p,hsa-miR-6838-5p,hsa-miR-8056,hsa-miR-3120-3p,hsa-miR-15b-5p,hsa-miR-3605-5p,hsa-miR-497-5p,hsa-miR-5586-5p,hsa-miR-6853-3p,hsa-miR-424-5p,hsa-miR-5706,hsa-miR-4779,hsa-miR-4504,hsa-miR-1302,hsa-miR-6849-5p,hsa-miR-4782-5p
hsa_circ_IPCEF1	hsa_circ_IPCEF1	circRNA	NM_022039	FBXW4	protein_coding	hsa-miR-3619-5p,hsa-miR-4314,hsa-miR-5589-5p,hsa-miR-6858-5p,hsa-miR-4646-5p,hsa-miR-16-5p,hsa-miR-15a-5p,hsa-miR-130b-5p,hsa-miR-216a-3p,hsa-miR-6838-5p,hsa-miR-6876-5p,hsa-miR-4742-5p,hsa-miR-128-3p,hsa-miR-15b-5p,hsa-miR-4710,hsa-miR-204-3p,hsa-miR-497-5p,hsa-miR-424-5p,hsa-miR-1298-3p,hsa-miR-214-3p,hsa-miR-4476,hsa-miR-3681-3p,hsa-miR-6747-3p
hsa_circ_IPCEF1	hsa_circ_IPCEF1	circRNA	NM_181600	KRTAP13-4	protein_coding	hsa-miR-3619-5p,hsa-miR-16-5p,hsa-miR-195-5p,hsa-miR-15a-5p,hsa-miR-4533,hsa-miR-15b-5p,hsa-miR-9500,hsa-miR-510-5p,hsa-miR-3605-5p,hsa-miR-497-5p,hsa-miR-761,hsa-miR-922,hsa-miR-424-5p,hsa-miR-1252-5p,hsa-miR-214-3p,hsa-miR-5706,hsa-miR-4530,hsa-miR-3692-5p,hsa-miR-4782-5p
hsa_circ_IPCEF1	hsa_circ_IPCEF1	circRNA	NM_003896	ST3GAL5	protein_coding	hsa-miR-3619-5p,hsa-miR-4646-5p,hsa-miR-195-5p,hsa-miR-15a-5p,hsa-miR-6838-5p,hsa-miR-4742-3p,hsa-miR-15b-5p,hsa-miR-204-3p,hsa-miR-497-5p,hsa-miR-761,hsa-miR-4291,hsa-miR-922,hsa-miR-424-5p,hsa-miR-6077,hsa-miR-3918,hsa-miR-214-3p,hsa-miR-5706,hsa-miR-4753-3p,hsa-miR-4782-5p
hsa_circ_IPCEF1	hsa_circ_IPCEF1	circRNA	NM_004918	TCL1B	protein_coding	hsa-miR-3619-5p,hsa-miR-5589-5p,hsa-miR-6894-3p,hsa-miR-6776-5p,hsa-miR-6858-5p,hsa-miR-6842-5p,hsa-miR-4298,hsa-miR-4505,hsa-miR-3173-3p,hsa-miR-5787,hsa-miR-761,hsa-miR-4291,hsa-miR-4689,hsa-miR-922,hsa-miR-3918,hsa-miR-214-3p,hsa-miR-4530,hsa-miR-6752-5p,hsa-miR-7110-5p
hsa_circRNA_074530	hsa_circ_0074530	circRNA	NM_025249	KIAA1683	protein_coding	hsa-miR-515-3p,hsa-miR-519e-3p,hsa-miR-33b-3p
hsa_circ_IPCEF1	hsa_circ_IPCEF1	circRNA	NM_016463	CXXC5	protein_coding	hsa-miR-3619-5p,hsa-miR-548g-3p,hsa-miR-3691-5p,hsa-miR-3681-5p,hsa-miR-608,hsa-miR-28-3p,hsa-miR-4782-3p,hsa-miR-4533,hsa-miR-6876-5p,hsa-miR-432-3p,hsa-miR-8056,hsa-miR-3134,hsa-miR-4742-5p,hsa-miR-761,hsa-miR-4291,hsa-miR-6766-3p,hsa-miR-1252-5p,hsa-miR-214-3p,hsa-miR-548av-3p,hsa-miR-4476,hsa-miR-4651,hsa-miR-6849-5p,hsa-miR-4753-3p
hsa_circ_IPCEF1	hsa_circ_IPCEF1	circRNA	NM_002670	PLS1	protein_coding	hsa-miR-3619-5p,hsa-miR-5589-5p,hsa-miR-4647,hsa-miR-6776-5p,hsa-miR-4662b,hsa-miR-16-5p,hsa-miR-195-5p,hsa-miR-15a-5p,hsa-miR-4701-3p,hsa-miR-1262,hsa-miR-6838-5p,hsa-miR-6736-5p,hsa-miR-766-5p,hsa-miR-15b-5p,hsa-miR-497-5p,hsa-miR-922,hsa-miR-4426,hsa-miR-4499,hsa-miR-5706,hsa-miR-4645-3p,hsa-miR-4782-5p,hsa-miR-6873-3p
hsa_circ_IPCEF1	hsa_circ_IPCEF1	circRNA	NM_024535	CORO7	protein_coding	hsa-miR-3619-5p,hsa-miR-4690-5p,hsa-miR-4646-5p,hsa-miR-141-5p,hsa-miR-4685-5p,hsa-miR-6838-5p,hsa-miR-4505,hsa-miR-4742-5p,hsa-miR-5787,hsa-miR-204-3p,hsa-miR-3605-5p,hsa-miR-497-5p,hsa-miR-761,hsa-miR-4291,hsa-miR-922,hsa-miR-3918,hsa-miR-214-3p,hsa-miR-6837-5p
hsa_circ_IPCEF1	hsa_circ_IPCEF1	circRNA	NM_002878	RAD51D	protein_coding	hsa-miR-3619-5p,hsa-miR-4690-5p,hsa-miR-6818-3p,hsa-miR-4646-5p,hsa-miR-16-5p,hsa-miR-195-5p,hsa-miR-15a-5p,hsa-miR-28-3p,hsa-miR-4533,hsa-miR-130b-5p,hsa-miR-216a-3p,hsa-miR-6838-5p,hsa-miR-3173-3p,hsa-miR-766-5p,hsa-miR-128-3p,hsa-miR-15b-5p,hsa-miR-9500,hsa-miR-6891-5p,hsa-miR-5787,hsa-miR-204-3p,hsa-miR-497-5p,hsa-miR-761,hsa-miR-424-5p,hsa-miR-1252-5p,hsa-miR-6077,hsa-miR-7114-5p,hsa-miR-607…
hsa_circ_IPCEF1	hsa_circ_IPCEF1	circRNA	NM_001143780	SLC25A39	protein_coding	hsa-miR-3619-5p,hsa-miR-5589-5p,hsa-miR-608,hsa-miR-545-3p,hsa-miR-6842-5p,hsa-miR-16-5p,hsa-miR-195-5p,hsa-miR-15a-5p,hsa-miR-6838-5p,hsa-miR-4505,hsa-miR-3120-3p,hsa-miR-5787,hsa-miR-497-5p,hsa-miR-761,hsa-miR-424-5p,hsa-miR-214-3p,hsa-miR-4651,hsa-miR-6752-5p,hsa-miR-7110-5p
hsa_circ_IPCEF1	hsa_circ_IPCEF1	circRNA	NM_006711	RNPS1	protein_coding	hsa-miR-5589-5p,hsa-miR-6894-3p,hsa-miR-6776-5p,hsa-miR-6842-5p,hsa-miR-16-5p,hsa-miR-195-5p,hsa-miR-15a-5p,hsa-miR-4701-3p,hsa-miR-1262,hsa-miR-6838-5p,hsa-miR-548e-5p,hsa-miR-6736-5p,hsa-miR-15b-5p,hsa-miR-6732-5p,hsa-miR-370-3p,hsa-miR-889-5p,hsa-miR-497-5p,hsa-miR-424-5p,hsa-miR-4504,hsa-miR-6752-5p,hsa-miR-6893-3p,hsa-miR-7110-5p
hsa_circ_IPCEF1	hsa_circ_IPCEF1	circRNA	NM_001005190	OR7A10	protein_coding	hsa-miR-6776-5p,hsa-miR-6842-5p,hsa-miR-4701-3p,hsa-miR-1262,hsa-miR-216a-3p,hsa-miR-6876-5p,hsa-miR-552-3p,hsa-miR-3173-3p,hsa-miR-4742-5p,hsa-miR-6736-5p,hsa-miR-766-5p,hsa-miR-128-3p,hsa-miR-640,hsa-miR-1468-3p,hsa-miR-6891-5p,hsa-miR-922,hsa-miR-1252-5p,hsa-miR-1298-3p,hsa-miR-4530,hsa-miR-4476,hsa-miR-3681-3p,hsa-miR-6752-5p,hsa-miR-4782-5p,hsa-miR-7110-5p
hsa_circRNA_074530	hsa_circ_0074530	circRNA	NM_080284	ABCA6	protein_coding	hsa-miR-515-3p,hsa-miR-1271-3p,hsa-miR-519e-3p,hsa-miR-33b-3p
hsa_circ_IPCEF1	hsa_circ_IPCEF1	circRNA	NM_001004052	OR52B2	protein_coding	hsa-miR-3619-5p,hsa-miR-4647,hsa-miR-4646-5p,hsa-miR-4662b,hsa-miR-4533,hsa-miR-4701-3p,hsa-miR-1262,hsa-miR-6876-5p,hsa-miR-548e-5p,hsa-miR-6736-5p,hsa-miR-7113-5p,hsa-miR-204-3p,hsa-miR-3605-5p,hsa-miR-761,hsa-miR-4512,hsa-miR-214-3p,hsa-miR-548av-3p,hsa-miR-4476
hsa_circ_IPCEF1	hsa_circ_IPCEF1	circRNA	NM_001037163	FAM220A	protein_coding	hsa-miR-3619-5p,hsa-miR-4314,hsa-miR-1323,hsa-miR-4646-5p,hsa-miR-4298,hsa-miR-4533,hsa-miR-4701-3p,hsa-miR-1262,hsa-miR-6736-5p,hsa-miR-204-3p,hsa-miR-761,hsa-miR-4512,hsa-miR-1252-5p,hsa-miR-1298-3p,hsa-miR-3918,hsa-miR-214-3p,hsa-miR-4436b-5p,hsa-miR-1302,hsa-miR-4645-3p,hsa-miR-6841-5p
hsa_circRNA_074530	hsa_circ_0074530	circRNA	NM_001128077	KRTAP20-3	protein_coding	hsa-miR-515-3p,hsa-miR-1271-3p,hsa-miR-519e-3p,hsa-miR-4697-3p,hsa-miR-33b-3p
hsa_circ_IPCEF1	hsa_circ_IPCEF1	circRNA	NM_017504	OR2M4	protein_coding	hsa-miR-3619-5p,hsa-miR-3691-5p,hsa-miR-4752,hsa-miR-6858-5p,hsa-miR-6842-5p,hsa-miR-16-5p,hsa-miR-3692-3p,hsa-miR-195-5p,hsa-miR-15a-5p,hsa-miR-6838-5p,hsa-miR-6876-5p,hsa-miR-552-3p,hsa-miR-766-5p,hsa-miR-15b-5p,hsa-miR-3605-5p,hsa-miR-497-5p,hsa-miR-761,hsa-miR-4689,hsa-miR-214-3p,hsa-miR-4530,hsa-miR-4476,hsa-miR-6752-5p,hsa-miR-7110-5p
hsa_circ_0057691	hsa_circ_0057691	circRNA	UC011MNK.2	GAGE4	protein_coding	hsa-miR-30c-1-3p,hsa-miR-30c-2-3p
hsa_circ_IPCEF1	hsa_circ_IPCEF1	circRNA	NM_018384	GIMAP5	protein_coding	hsa-miR-3619-5p,hsa-miR-4690-5p,hsa-miR-608,hsa-miR-141-5p,hsa-miR-16-5p,hsa-miR-195-5p,hsa-miR-15a-5p,hsa-miR-6838-5p,hsa-miR-3166,hsa-miR-3120-3p,hsa-miR-766-5p,hsa-miR-15b-5p,hsa-miR-7113-5p,hsa-miR-497-5p,hsa-miR-424-5p,hsa-miR-214-3p,hsa-miR-3921,hsa-miR-4653-5p
hsa_circ_IPCEF1	hsa_circ_IPCEF1	circRNA	NM_015645	C1QTNF5	protein_coding	hsa-miR-3619-5p,hsa-miR-608,hsa-miR-6842-5p,hsa-miR-494-5p,hsa-miR-6838-5p,hsa-miR-3166,hsa-miR-6732-5p,hsa-miR-323b-5p,hsa-miR-410-5p,hsa-miR-761,hsa-miR-5586-5p,hsa-miR-6077,hsa-miR-214-3p,hsa-miR-4530,hsa-miR-4651,hsa-miR-6752-5p,hsa-miR-3921,hsa-miR-7110-5p,hsa-miR-4653-5p
hsa_circ_0095448	hsa_circ_0095448	circRNA	NM_199173	BGLAP	protein_coding	hsa-miR-646,hsa-miR-4725-3p,hsa-miR-3125,hsa-miR-4271,hsa-miR-6859-5p,hsa-miR-3916,hsa-miR-6780b-5p
hsa_circ_IPCEF1	hsa_circ_IPCEF1	circRNA	NM_001004466	OR10H5	protein_coding	hsa-miR-3619-5p,hsa-miR-6776-5p,hsa-miR-608,hsa-miR-6858-5p,hsa-miR-6842-5p,hsa-miR-4533,hsa-miR-4701-3p,hsa-miR-1262,hsa-miR-216a-3p,hsa-miR-6876-5p,hsa-miR-6736-5p,hsa-miR-128-3p,hsa-miR-6732-5p,hsa-miR-3605-5p,hsa-miR-761,hsa-miR-4291,hsa-miR-4689,hsa-miR-922,hsa-miR-4312,hsa-miR-6077,hsa-miR-3918,hsa-miR-214-3p,hsa-miR-4530,hsa-miR-4476,hsa-miR-4651,hsa-miR-6752-5p,hsa-miR-7110-5p
hsa_circ_IPCEF1	hsa_circ_IPCEF1	circRNA	ENST00000304311	DPCR1	protein_coding	hsa-miR-4647,hsa-miR-608,hsa-miR-6842-5p,hsa-miR-4662b,hsa-miR-4668-3p,hsa-miR-4701-3p,hsa-miR-6891-3p,hsa-miR-4646-3p,hsa-miR-1262,hsa-miR-4685-5p,hsa-miR-3173-3p,hsa-miR-6736-5p,hsa-miR-766-5p,hsa-miR-9500,hsa-miR-6891-5p,hsa-miR-4426,hsa-miR-1252-5p,hsa-miR-6077,hsa-miR-6072,hsa-miR-6837-5p,hsa-miR-7152-5p,hsa-miR-4651,hsa-miR-3692-5p,hsa-miR-6752-5p,hsa-miR-4645-3p,hsa-miR-4753-3p,hsa-miR-711…
hsa_circ_IPCEF1	hsa_circ_IPCEF1	circRNA	NM_001005197	OR8D4	protein_coding	hsa-miR-3691-5p,hsa-miR-6776-5p,hsa-miR-3681-5p,hsa-miR-4701-3p,hsa-miR-216a-3p,hsa-miR-552-3p,hsa-miR-3134,hsa-miR-6736-5p,hsa-miR-640,hsa-miR-4710,hsa-miR-889-5p,hsa-miR-510-5p,hsa-miR-3605-5p,hsa-miR-922,hsa-miR-4530,hsa-miR-892a,hsa-miR-3681-3p,hsa-miR-6752-5p,hsa-miR-6849-5p,hsa-miR-7110-5p
hsa_circ_IPCEF1	hsa_circ_IPCEF1	circRNA	NM_145652	WFDC5	protein_coding	hsa-miR-3619-5p,hsa-miR-4690-5p,hsa-miR-3691-5p,hsa-miR-608,hsa-miR-16-5p,hsa-miR-195-5p,hsa-miR-15a-5p,hsa-miR-130b-5p,hsa-miR-6838-5p,hsa-miR-6876-5p,hsa-miR-432-3p,hsa-miR-766-5p,hsa-miR-15b-5p,hsa-miR-9500,hsa-miR-497-5p,hsa-miR-761,hsa-miR-4291,hsa-miR-424-5p,hsa-miR-214-3p,hsa-miR-4476,hsa-miR-1257,hsa-miR-4651
hsa_circ_IPCEF1	hsa_circ_IPCEF1	circRNA	NM_172194	OR4Q3	protein_coding	hsa-miR-3619-5p,hsa-miR-4690-5p,hsa-miR-3681-5p,hsa-miR-545-3p,hsa-miR-4298,hsa-miR-3166,hsa-miR-4742-5p,hsa-miR-125a-3p,hsa-miR-766-5p,hsa-miR-6732-5p,hsa-miR-370-3p,hsa-miR-6787-3p,hsa-miR-761,hsa-miR-922,hsa-miR-1298-3p,hsa-miR-214-3p,hsa-miR-4530,hsa-miR-1302,hsa-miR-6849-5p
hsa_circ_IPCEF1	hsa_circ_IPCEF1	circRNA	UC021UBM.2	BC024682	protein_coding	hsa-miR-3691-5p,hsa-miR-6776-5p,hsa-miR-608,hsa-miR-494-5p,hsa-miR-4646-5p,hsa-miR-141-5p,hsa-miR-16-5p,hsa-miR-195-5p,hsa-miR-15a-5p,hsa-miR-4533,hsa-miR-4701-3p,hsa-miR-1262,hsa-miR-4685-5p,hsa-miR-216a-3p,hsa-miR-6838-5p,hsa-miR-6876-5p,hsa-miR-6736-5p,hsa-miR-128-3p,hsa-miR-15b-5p,hsa-miR-323b-5p,hsa-miR-410-5p,hsa-miR-204-3p,hsa-miR-497-5p,hsa-miR-424-5p,hsa-miR-3918,hsa-miR-4436b-5p,hsa-miR…
hsa_circ_IPCEF1	hsa_circ_IPCEF1	circRNA	NM_004800	TM9SF2	protein_coding	hsa-miR-16-5p,hsa-miR-195-5p,hsa-miR-15a-5p,hsa-miR-4668-3p,hsa-miR-216a-3p,hsa-miR-6838-5p,hsa-miR-4742-3p,hsa-miR-128-3p,hsa-miR-15b-5p,hsa-miR-497-5p,hsa-miR-452-5p,hsa-miR-424-5p,hsa-miR-4762-3p,hsa-miR-6077,hsa-miR-3681-3p,hsa-miR-892c-3p,hsa-miR-4645-3p,hsa-miR-6747-3p
hsa_circ_IPCEF1	hsa_circ_IPCEF1	circRNA	NM_001190844	TMEM221	protein_coding	hsa-miR-3681-5p,hsa-miR-6858-5p,hsa-miR-4646-5p,hsa-miR-16-5p,hsa-miR-195-5p,hsa-miR-15a-5p,hsa-miR-501-5p,hsa-miR-6891-3p,hsa-miR-6838-5p,hsa-miR-8056,hsa-miR-125a-3p,hsa-miR-15b-5p,hsa-miR-204-3p,hsa-miR-497-5p,hsa-miR-4291,hsa-miR-4689,hsa-miR-5089-3p,hsa-miR-424-5p,hsa-miR-3918,hsa-miR-4711-3p,hsa-miR-6752-5p,hsa-miR-6849-5p,hsa-miR-7110-5p
hsa_circ_IPCEF1	hsa_circ_IPCEF1	circRNA	NM_006052	DSCR3	protein_coding	hsa-miR-4314,hsa-miR-6776-5p,hsa-miR-6895-3p,hsa-miR-608,hsa-miR-4646-5p,hsa-miR-16-5p,hsa-miR-195-5p,hsa-miR-15a-5p,hsa-miR-4533,hsa-miR-4701-3p,hsa-miR-4646-3p,hsa-miR-1262,hsa-miR-6838-5p,hsa-miR-6876-5p,hsa-miR-4505,hsa-miR-6736-5p,hsa-miR-125a-3p,hsa-miR-15b-5p,hsa-miR-9500,hsa-miR-6787-3p,hsa-miR-510-5p,hsa-miR-5787,hsa-miR-204-3p,hsa-miR-497-5p,hsa-miR-3074-5p,hsa-miR-4676-3p,hsa-miR-5089-…
hsa_circ_IPCEF1	hsa_circ_IPCEF1	circRNA	UC002FQM.2	AK127378	protein_coding	hsa-miR-3619-5p,hsa-miR-5589-5p,hsa-miR-4690-5p,hsa-miR-6776-5p,hsa-miR-16-5p,hsa-miR-195-5p,hsa-miR-15a-5p,hsa-miR-216a-3p,hsa-miR-6838-5p,hsa-miR-4505,hsa-miR-15b-5p,hsa-miR-6891-5p,hsa-miR-5787,hsa-miR-497-5p,hsa-miR-761,hsa-miR-4291,hsa-miR-424-5p,hsa-miR-214-3p,hsa-miR-4530,hsa-miR-6747-3p,hsa-miR-6893-3p
hsa_circ_IPCEF1	hsa_circ_IPCEF1	circRNA	NM_152438	DDX11	protein_coding	hsa-miR-3619-5p,hsa-miR-3691-5p,hsa-miR-3681-5p,hsa-miR-4298,hsa-miR-4533,hsa-miR-4646-3p,hsa-miR-4685-5p,hsa-miR-216a-3p,hsa-miR-6876-5p,hsa-miR-3173-3p,hsa-miR-766-5p,hsa-miR-6891-5p,hsa-miR-510-5p,hsa-miR-761,hsa-miR-4291,hsa-miR-4512,hsa-miR-1298-3p,hsa-miR-3918,hsa-miR-214-3p,hsa-miR-4779,hsa-miR-4711-3p,hsa-miR-6837-5p,hsa-miR-4476,hsa-miR-3681-3p,hsa-miR-6849-5p
hsa_circRNA_074530	hsa_circ_0074530	circRNA	NM_145715	TIGD2	protein_coding	hsa-miR-515-3p,hsa-miR-519e-3p,hsa-miR-33b-3p,hsa-miR-1909-5p
hsa_circ_IPCEF1	hsa_circ_IPCEF1	circRNA	NM_017797	BTBD2	protein_coding	hsa-miR-3691-5p,hsa-miR-608,hsa-miR-6858-5p,hsa-miR-6842-5p,hsa-miR-15a-5p,hsa-miR-4782-3p,hsa-miR-4685-5p,hsa-miR-15b-5p,hsa-miR-7113-5p,hsa-miR-497-5p,hsa-miR-5586-5p,hsa-miR-4512,hsa-miR-4689,hsa-miR-922,hsa-miR-6766-3p,hsa-miR-424-5p,hsa-miR-1298-3p,hsa-miR-3918,hsa-miR-6837-5p,hsa-miR-4530,hsa-miR-6752-5p,hsa-miR-7110-5p
hsa_circ_IPCEF1	hsa_circ_IPCEF1	circRNA	NM_001008737	LOC401052	protein_coding	hsa-miR-3691-5p,hsa-miR-6818-3p,hsa-miR-3681-5p,hsa-miR-6895-3p,hsa-miR-545-3p,hsa-miR-494-5p,hsa-miR-145-3p,hsa-miR-3120-3p,hsa-miR-766-5p,hsa-miR-323b-5p,hsa-miR-889-5p,hsa-miR-510-5p,hsa-miR-410-5p,hsa-miR-3074-5p,hsa-miR-922,hsa-miR-6077,hsa-miR-548av-3p,hsa-miR-7152-5p,hsa-miR-6849-5p,hsa-miR-3921,hsa-miR-6873-3p,hsa-miR-4653-5p
hsa_circ_IPCEF1	hsa_circ_IPCEF1	circRNA	NM_014517	UBP1	protein_coding	hsa-miR-3619-5p,hsa-miR-4314,hsa-miR-4690-5p,hsa-miR-6894-3p,hsa-miR-3681-5p,hsa-miR-608,hsa-miR-6858-5p,hsa-miR-6842-5p,hsa-miR-4646-5p,hsa-miR-4298,hsa-miR-16-5p,hsa-miR-195-5p,hsa-miR-15a-5p,hsa-miR-4668-3p,hsa-miR-3166,hsa-miR-3120-3p,hsa-miR-4742-5p,hsa-miR-4742-3p,hsa-miR-766-5p,hsa-miR-15b-5p,hsa-miR-9500,hsa-miR-204-3p,hsa-miR-3605-5p,hsa-miR-497-5p,hsa-miR-761,hsa-miR-4689,hsa-miR-424-5p…
hsa_circ_IPCEF1	hsa_circ_IPCEF1	circRNA	NM_172000	TEDDM1	protein_coding	hsa-miR-4314,hsa-miR-3691-5p,hsa-miR-608,hsa-miR-6858-5p,hsa-miR-6842-5p,hsa-miR-4646-5p,hsa-miR-16-5p,hsa-miR-3692-3p,hsa-miR-195-5p,hsa-miR-15a-5p,hsa-miR-4701-3p,hsa-miR-1262,hsa-miR-130b-5p,hsa-miR-6838-5p,hsa-miR-4505,hsa-miR-3173-3p,hsa-miR-6736-5p,hsa-miR-766-5p,hsa-miR-15b-5p,hsa-miR-640,hsa-miR-9500,hsa-miR-4710,hsa-miR-6891-5p,hsa-miR-5787,hsa-miR-204-3p,hsa-miR-4291,hsa-miR-4689,hsa-mi…
hsa_circRNA_100721	hsa_circ_0020396	circRNA	ENST00000416501	AC015987.2	protein_coding	hsa-miR-132-3p,hsa-miR-212-3p,hsa-miR-301a-3p,hsa-miR-181b-2-3p,hsa-miR-454-3p,hsa-miR-204-5p,hsa-miR-211-5p,hsa-miR-181b-3p,hsa-miR-130a-3p,hsa-miR-10b-5p,hsa-miR-10a-5p
hsa_circ_IPCEF1	hsa_circ_IPCEF1	circRNA	NM_145295	ZNF627	protein_coding	hsa-miR-4314,hsa-miR-3691-5p,hsa-miR-6776-5p,hsa-miR-4752,hsa-miR-6895-3p,hsa-miR-6858-5p,hsa-miR-4646-5p,hsa-miR-16-5p,hsa-miR-195-5p,hsa-miR-15a-5p,hsa-miR-501-5p,hsa-miR-4701-3p,hsa-miR-216a-3p,hsa-miR-6838-5p,hsa-miR-432-3p,hsa-miR-3134,hsa-miR-6736-5p,hsa-miR-766-5p,hsa-miR-15b-5p,hsa-miR-4710,hsa-miR-204-3p,hsa-miR-497-5p,hsa-miR-4689,hsa-miR-922,hsa-miR-452-5p,hsa-miR-424-5p,hsa-miR-1252-5…
hsa_circ_IPCEF1	hsa_circ_IPCEF1	circRNA	NM_013245	VPS4A	protein_coding	hsa-miR-5589-5p,hsa-miR-6776-5p,hsa-miR-6818-3p,hsa-miR-4298,hsa-miR-4662b,hsa-miR-16-5p,hsa-miR-195-5p,hsa-miR-15a-5p,hsa-miR-4668-3p,hsa-miR-1262,hsa-miR-4685-5p,hsa-miR-6838-5p,hsa-miR-4505,hsa-miR-125a-3p,hsa-miR-766-5p,hsa-miR-15b-5p,hsa-miR-5787,hsa-miR-497-5p,hsa-miR-922,hsa-miR-4426,hsa-miR-424-5p,hsa-miR-6077,hsa-miR-4779,hsa-miR-6837-5p,hsa-miR-1302
hsa_circ_IPCEF1	hsa_circ_IPCEF1	circRNA	NM_001004453	OR1L6	protein_coding	hsa-miR-3619-5p,hsa-miR-5589-5p,hsa-miR-4690-5p,hsa-miR-4647,hsa-miR-6776-5p,hsa-miR-6818-3p,hsa-miR-4662b,hsa-miR-216a-3p,hsa-miR-6876-5p,hsa-miR-4505,hsa-miR-4742-5p,hsa-miR-128-3p,hsa-miR-6732-5p,hsa-miR-5787,hsa-miR-3605-5p,hsa-miR-761,hsa-miR-592,hsa-miR-1298-3p,hsa-miR-6077,hsa-miR-214-3p,hsa-miR-4436b-5p,hsa-miR-4530,hsa-miR-4476,hsa-miR-892a,hsa-miR-3681-3p
hsa_circ_IPCEF1	hsa_circ_IPCEF1	circRNA	NM_003684	MKNK1	protein_coding	hsa-miR-3619-5p,hsa-miR-4314,hsa-miR-4690-5p,hsa-miR-6894-3p,hsa-miR-6818-3p,hsa-miR-545-3p,hsa-miR-4646-5p,hsa-miR-16-5p,hsa-miR-195-5p,hsa-miR-15a-5p,hsa-miR-4533,hsa-miR-6838-5p,hsa-miR-6876-5p,hsa-miR-3166,hsa-miR-3120-3p,hsa-miR-4742-5p,hsa-miR-548e-5p,hsa-miR-15b-5p,hsa-miR-9500,hsa-miR-370-3p,hsa-miR-889-5p,hsa-miR-204-3p,hsa-miR-497-5p,hsa-miR-3074-5p,hsa-miR-4291,hsa-miR-4512,hsa-miR-922…
hsa_circ_IPCEF1	hsa_circ_IPCEF1	circRNA	NM_001005471	OR2T6	protein_coding	hsa-miR-3619-5p,hsa-miR-6858-5p,hsa-miR-6842-5p,hsa-miR-16-5p,hsa-miR-195-5p,hsa-miR-15a-5p,hsa-miR-4646-3p,hsa-miR-6838-5p,hsa-miR-766-5p,hsa-miR-15b-5p,hsa-miR-4710,hsa-miR-3605-5p,hsa-miR-497-5p,hsa-miR-761,hsa-miR-4676-3p,hsa-miR-4689,hsa-miR-592,hsa-miR-1266-3p,hsa-miR-452-5p,hsa-miR-424-5p,hsa-miR-214-3p,hsa-miR-4530,hsa-miR-6752-5p,hsa-miR-7110-5p
hsa_circ_IPCEF1	hsa_circ_IPCEF1	circRNA	NM_004628	XPC	protein_coding	hsa-miR-6776-5p,hsa-miR-4662b,hsa-miR-15a-5p,hsa-miR-28-3p,hsa-miR-4701-3p,hsa-miR-1262,hsa-miR-4685-5p,hsa-miR-6838-5p,hsa-miR-6736-5p,hsa-miR-15b-5p,hsa-miR-6787-3p,hsa-miR-510-5p,hsa-miR-5787,hsa-miR-497-5p,hsa-miR-4291,hsa-miR-922,hsa-miR-4426,hsa-miR-424-5p,hsa-miR-6837-5p,hsa-miR-4530
hsa_circ_IPCEF1	hsa_circ_IPCEF1	circRNA	NM_001276	CHI3L1	protein_coding	hsa-miR-3619-5p,hsa-miR-4685-5p,hsa-miR-6876-5p,hsa-miR-4505,hsa-miR-3173-3p,hsa-miR-125a-3p,hsa-miR-6732-5p,hsa-miR-6891-5p,hsa-miR-5787,hsa-miR-761,hsa-miR-4291,hsa-miR-7114-5p,hsa-miR-214-3p,hsa-miR-4711-3p,hsa-miR-6837-5p,hsa-miR-4476,hsa-miR-892a,hsa-miR-6857-3p
hsa_circ_IPCEF1	hsa_circ_IPCEF1	circRNA	NM_014289	CAPN6	protein_coding	hsa-miR-3619-5p,hsa-miR-5589-5p,hsa-miR-4690-5p,hsa-miR-4647,hsa-miR-3691-5p,hsa-miR-6776-5p,hsa-miR-608,hsa-miR-6858-5p,hsa-miR-6842-5p,hsa-miR-4646-5p,hsa-miR-4662b,hsa-miR-16-5p,hsa-miR-195-5p,hsa-miR-15a-5p,hsa-miR-4701-3p,hsa-miR-1262,hsa-miR-6838-5p,hsa-miR-3173-3p,hsa-miR-6736-5p,hsa-miR-15b-5p,hsa-miR-9500,hsa-miR-6891-5p,hsa-miR-5787,hsa-miR-204-3p,hsa-miR-497-5p,hsa-miR-761,hsa-miR-4689…
hsa_circ_IPCEF1	hsa_circ_IPCEF1	circRNA	NM_032594	INSM2	protein_coding	hsa-miR-3681-5p,hsa-miR-545-3p,hsa-miR-6842-5p,hsa-miR-141-5p,hsa-miR-16-5p,hsa-miR-195-5p,hsa-miR-15a-5p,hsa-miR-4668-3p,hsa-miR-4533,hsa-miR-1262,hsa-miR-6838-5p,hsa-miR-6876-5p,hsa-miR-8056,hsa-miR-4742-3p,hsa-miR-6736-5p,hsa-miR-15b-5p,hsa-miR-6732-5p,hsa-miR-497-5p,hsa-miR-922,hsa-miR-424-5p,hsa-miR-4476,hsa-miR-6752-5p,hsa-miR-6849-5p,hsa-miR-7110-5p
hsa_circ_0057691	hsa_circ_0057691	circRNA	NM_001127199	GAGE12D	protein_coding	hsa-miR-30c-1-3p,hsa-miR-30c-2-3p
hsa_circ_IPCEF1	hsa_circ_IPCEF1	circRNA	NM_172347	KCNG4	protein_coding	hsa-miR-3619-5p,hsa-miR-4314,hsa-miR-4690-5p,hsa-miR-6894-3p,hsa-miR-3691-5p,hsa-miR-6818-3p,hsa-miR-4752,hsa-miR-4646-5p,hsa-miR-4298,hsa-miR-16-5p,hsa-miR-195-5p,hsa-miR-15a-5p,hsa-miR-4533,hsa-miR-6838-5p,hsa-miR-6876-5p,hsa-miR-3173-3p,hsa-miR-6736-5p,hsa-miR-15b-5p,hsa-miR-6891-5p,hsa-miR-6787-3p,hsa-miR-204-3p,hsa-miR-497-5p,hsa-miR-761,hsa-miR-424-5p,hsa-miR-1252-5p,hsa-miR-4499,hsa-miR-71…
hsa_circ_IPCEF1	hsa_circ_IPCEF1	circRNA	NM_153269	C20orf96	protein_coding	hsa-miR-4646-5p,hsa-miR-16-5p,hsa-miR-195-5p,hsa-miR-15a-5p,hsa-miR-4533,hsa-miR-6838-5p,hsa-miR-6876-5p,hsa-miR-3173-3p,hsa-miR-766-5p,hsa-miR-15b-5p,hsa-miR-640,hsa-miR-9500,hsa-miR-6891-5p,hsa-miR-204-3p,hsa-miR-497-5p,hsa-miR-6077,hsa-miR-4779,hsa-miR-4530,hsa-miR-4476
hsa_circ_IPCEF1	hsa_circ_IPCEF1	circRNA	NM_170600	SH2D3C	protein_coding	hsa-miR-3619-5p,hsa-miR-608,hsa-miR-6858-5p,hsa-miR-16-5p,hsa-miR-195-5p,hsa-miR-15a-5p,hsa-miR-216a-3p,hsa-miR-6838-5p,hsa-miR-6876-5p,hsa-miR-128-3p,hsa-miR-15b-5p,hsa-miR-4710,hsa-miR-497-5p,hsa-miR-761,hsa-miR-4689,hsa-miR-1266-3p,hsa-miR-424-5p,hsa-miR-214-3p,hsa-miR-4530,hsa-miR-7152-5p,hsa-miR-3681-3p,hsa-miR-6747-3p
hsa_circ_IPCEF1	hsa_circ_IPCEF1	circRNA	NM_006018	HCAR3	protein_coding	hsa-miR-4690-5p,hsa-miR-195-5p,hsa-miR-15a-5p,hsa-miR-145-3p,hsa-miR-6838-5p,hsa-miR-548e-5p,hsa-miR-125a-3p,hsa-miR-766-5p,hsa-miR-15b-5p,hsa-miR-6787-3p,hsa-miR-497-5p,hsa-miR-3074-5p,hsa-miR-4676-3p,hsa-miR-4291,hsa-miR-922,hsa-miR-452-5p,hsa-miR-424-5p,hsa-miR-892c-3p
hsa_circ_0057691	hsa_circ_0057691	circRNA	NM_001472	GAGE2C	protein_coding	hsa-miR-30c-1-3p,hsa-miR-30c-2-3p
hsa_circ_IPCEF1	hsa_circ_IPCEF1	circRNA	NM_177551	HCAR2	protein_coding	hsa-miR-4690-5p,hsa-miR-195-5p,hsa-miR-15a-5p,hsa-miR-145-3p,hsa-miR-6838-5p,hsa-miR-548e-5p,hsa-miR-125a-3p,hsa-miR-766-5p,hsa-miR-15b-5p,hsa-miR-6787-3p,hsa-miR-497-5p,hsa-miR-3074-5p,hsa-miR-4676-3p,hsa-miR-4291,hsa-miR-922,hsa-miR-452-5p,hsa-miR-424-5p,hsa-miR-892c-3p
hsa_circ_IPCEF1	hsa_circ_IPCEF1	circRNA	NM_002064	GLRX	protein_coding	hsa-miR-4647,hsa-miR-4752,hsa-miR-608,hsa-miR-433-3p,hsa-miR-4662b,hsa-miR-16-5p,hsa-miR-195-5p,hsa-miR-15a-5p,hsa-miR-130b-5p,hsa-miR-216a-3p,hsa-miR-6838-5p,hsa-miR-8056,hsa-miR-4742-5p,hsa-miR-128-3p,hsa-miR-15b-5p,hsa-miR-640,hsa-miR-497-5p,hsa-miR-5586-5p,hsa-miR-424-5p,hsa-miR-1252-5p,hsa-miR-3918,hsa-miR-7114-5p,hsa-miR-5706,hsa-miR-4436b-5p,hsa-miR-3681-3p,hsa-miR-4651,hsa-miR-4782-5p
hsa_circ_IPCEF1	hsa_circ_IPCEF1	circRNA	NM_001156474	CCDC81	protein_coding	hsa-miR-3619-5p,hsa-miR-6837-3p,hsa-miR-608,hsa-miR-6842-5p,hsa-miR-195-5p,hsa-miR-15a-5p,hsa-miR-6838-5p,hsa-miR-4505,hsa-miR-766-5p,hsa-miR-15b-5p,hsa-miR-5787,hsa-miR-497-5p,hsa-miR-761,hsa-miR-424-5p,hsa-miR-214-3p,hsa-miR-4651,hsa-miR-6752-5p,hsa-miR-3921,hsa-miR-7110-5p,hsa-miR-4653-5p
hsa_circ_IPCEF1	hsa_circ_IPCEF1	circRNA	UC003BDS.3	AK056490	protein_coding	hsa-miR-3619-5p,hsa-miR-1323,hsa-miR-3691-5p,hsa-miR-4752,hsa-miR-3692-3p,hsa-miR-4533,hsa-miR-4685-5p,hsa-miR-216a-3p,hsa-miR-3166,hsa-miR-3134,hsa-miR-4505,hsa-miR-3173-3p,hsa-miR-128-3p,hsa-miR-9500,hsa-miR-6891-5p,hsa-miR-7113-5p,hsa-miR-510-5p,hsa-miR-5787,hsa-miR-761,hsa-miR-922,hsa-miR-1266-3p,hsa-miR-214-3p,hsa-miR-4779,hsa-miR-6837-5p,hsa-miR-6809-5p,hsa-miR-3681-3p,hsa-miR-6752-5p,hsa-m…
hsa_circ_IPCEF1	hsa_circ_IPCEF1	circRNA	NM_001004738	OR5L1	protein_coding	hsa-miR-3619-5p,hsa-miR-6894-3p,hsa-miR-6858-5p,hsa-miR-6842-5p,hsa-miR-433-3p,hsa-miR-16-5p,hsa-miR-195-5p,hsa-miR-15a-5p,hsa-miR-4533,hsa-miR-216a-3p,hsa-miR-6838-5p,hsa-miR-6876-5p,hsa-miR-128-3p,hsa-miR-4710,hsa-miR-510-5p,hsa-miR-3605-5p,hsa-miR-761,hsa-miR-4689,hsa-miR-424-5p,hsa-miR-6077,hsa-miR-214-3p,hsa-miR-4530,hsa-miR-4476,hsa-miR-892a,hsa-miR-3681-3p,hsa-miR-6752-5p,hsa-miR-7110-5p
hsa_circRNA_100721	hsa_circ_0020396	circRNA	NM_001013699	H3F3C	protein_coding	hsa-miR-132-3p,hsa-miR-212-3p,hsa-miR-412-3p,hsa-miR-22-3p,hsa-miR-128-3p,hsa-miR-216a-3p,hsa-miR-181b-2-3p,hsa-miR-30e-5p,hsa-miR-181b-3p,hsa-miR-30c-5p,hsa-miR-30a-5p,hsa-miR-512-3p,hsa-miR-30b-5p,hsa-miR-30d-5p,hsa-miR-10b-5p,hsa-miR-10a-5p
hsa_circ_IPCEF1	hsa_circ_IPCEF1	circRNA	NM_001005325	OR6M1	protein_coding	hsa-miR-6776-5p,hsa-miR-6818-3p,hsa-miR-6895-3p,hsa-miR-6858-5p,hsa-miR-545-3p,hsa-miR-433-3p,hsa-miR-4646-5p,hsa-miR-6876-5p,hsa-miR-370-3p,hsa-miR-7113-5p,hsa-miR-204-3p,hsa-miR-4689,hsa-miR-922,hsa-miR-4312,hsa-miR-4530,hsa-miR-1257,hsa-miR-7152-5p,hsa-miR-6873-3p,hsa-miR-6893-3p
hsa_circ_0095448	hsa_circ_0095448	circRNA	ENST00000538322	AL133481.1	protein_coding	hsa-miR-4722-5p,hsa-miR-1205,hsa-miR-558,hsa-miR-3125,hsa-miR-298,hsa-miR-4768-3p,hsa-miR-6859-5p,hsa-miR-3916
hsa_circ_IPCEF1	hsa_circ_IPCEF1	circRNA	NM_006946	SPTBN2	protein_coding	hsa-miR-3619-5p,hsa-miR-4690-5p,hsa-miR-608,hsa-miR-6842-5p,hsa-miR-16-5p,hsa-miR-195-5p,hsa-miR-15a-5p,hsa-miR-4685-5p,hsa-miR-6838-5p,hsa-miR-4505,hsa-miR-15b-5p,hsa-miR-4710,hsa-miR-6732-5p,hsa-miR-5787,hsa-miR-497-5p,hsa-miR-761,hsa-miR-922,hsa-miR-424-5p,hsa-miR-3918,hsa-miR-214-3p,hsa-miR-4651,hsa-miR-6752-5p,hsa-miR-7110-5p,hsa-miR-4653-5p
hsa_circ_IPCEF1	hsa_circ_IPCEF1	circRNA	NM_007255	B4GALT7	protein_coding	hsa-miR-3619-5p,hsa-miR-6842-5p,hsa-miR-494-5p,hsa-miR-4533,hsa-miR-6876-5p,hsa-miR-3173-3p,hsa-miR-6891-5p,hsa-miR-323b-5p,hsa-miR-410-5p,hsa-miR-761,hsa-miR-5586-5p,hsa-miR-1266-3p,hsa-miR-4312,hsa-miR-214-3p,hsa-miR-4530,hsa-miR-4476,hsa-miR-892a,hsa-miR-6752-5p,hsa-miR-6747-3p,hsa-miR-7110-5p
hsa_circ_IPCEF1	hsa_circ_IPCEF1	circRNA	NM_138788	TMEM45B	protein_coding	hsa-miR-3619-5p,hsa-miR-4690-5p,hsa-miR-6894-3p,hsa-miR-6818-3p,hsa-miR-3681-5p,hsa-miR-6895-3p,hsa-miR-6858-5p,hsa-miR-16-5p,hsa-miR-195-5p,hsa-miR-15a-5p,hsa-miR-4668-3p,hsa-miR-501-5p,hsa-miR-6838-5p,hsa-miR-15b-5p,hsa-miR-497-5p,hsa-miR-5089-3p,hsa-miR-424-5p,hsa-miR-1252-5p,hsa-miR-1298-3p,hsa-miR-214-3p,hsa-miR-7152-5p,hsa-miR-6849-5p,hsa-miR-6747-3p,hsa-miR-6841-5p
hsa_circ_IPCEF1	hsa_circ_IPCEF1	circRNA	NM_012213	MLYCD	protein_coding	hsa-miR-6776-5p,hsa-miR-4646-5p,hsa-miR-141-5p,hsa-miR-16-5p,hsa-miR-195-5p,hsa-miR-15a-5p,hsa-miR-4646-3p,hsa-miR-216a-3p,hsa-miR-6838-5p,hsa-miR-128-3p,hsa-miR-15b-5p,hsa-miR-9500,hsa-miR-4710,hsa-miR-204-3p,hsa-miR-497-5p,hsa-miR-6853-3p,hsa-miR-424-5p,hsa-miR-1298-3p,hsa-miR-3681-3p
hsa_circ_IPCEF1	hsa_circ_IPCEF1	circRNA	NM_054107	OR1J2	protein_coding	hsa-miR-4752,hsa-miR-6858-5p,hsa-miR-6842-5p,hsa-miR-16-5p,hsa-miR-195-5p,hsa-miR-15a-5p,hsa-miR-130b-5p,hsa-miR-6838-5p,hsa-miR-3173-3p,hsa-miR-766-5p,hsa-miR-15b-5p,hsa-miR-370-3p,hsa-miR-6891-5p,hsa-miR-497-5p,hsa-miR-4512,hsa-miR-1266-3p,hsa-miR-424-5p,hsa-miR-6752-5p,hsa-miR-6893-3p,hsa-miR-7110-5p
#
